# Supplementary material for: Prediction of ionic liquid's heat capacity by means of their in silico principal properties
Source: Royal Society of Chemistry journal article supplement (doi:10.1039/c6ra05106e), 2016-01-01
Supplement: c6ra05106e1.pdf [file c6ra05106e1.pdf]

## Prediction of Ionic Liquids Heat Capacity by means of their *in silico* Principal Properties

Alessio Paternò,<sup>a</sup> Roberto Fiorenza<sup>a</sup>, Salvatore Marullo<sup>b</sup>, Giuseppe Musumarra<sup>a</sup> and Salvatore Scirè,<sup>a\*</sup>

<sup>a</sup> Dipartimento di Scienze Chimiche, Università di Catania, Viale A. Doria 6, I-95125 Catania, Italy.

<sup>b</sup> Dipartimento STEBICEF, Università di Palermo, Viale delle Scienze-Parco d'Orleans II, Ed.17, 90128 Palermo, Italy.

\*sscire@unict.it

## Experimental

### Computational Methods

PLS allows to find relationships between the VolSurf-derived properties matrix (X matrix) and the response, in this case heat capacity values of ILs.

The PLS algorithm computes PLS components for each of the two matrices (X and Y matrices), searching simultaneously for a linear relationship between the X-scores and Y-scores of the PLS components by means of equation (1), where  $b_a$  is a proportionality coefficient:

$$y_{ia} = \sum_{i=1}^A b_a t_{ia} + h_{ia} \quad (1)$$

The main statistical parameters provided by the PLS method [29] are  $R^2X$ ,  $R^2Y$  (respectively sum of squares of all the X's and Y's explained by all extracted components) and  $Q^2$ , the fraction of the total variation of the Y's predicted by all PLS components, as estimated by cross validation (CV).  $Q^2$  was computed as:  $1 - \text{PRESS}/\text{SS}$ , where SS is the residual sum of squares and PRESS is the squared difference between observed and predicted values for the data kept out of the model fitting. CV was performed in the same way than for PCA.

The statistical results obtained by the PLS method are able to detect what variables in the X block are relevant to determine the dependent variables (Y block) by means of the VIP values. SIMCA computes VIP values by summing over all model dimensions the contributions VIN (variable influence). For a given PLS dimension,  $a$ ,  $(\text{VIN})_{ak}^2$  is equal to the squared PLS weight  $(w_{ak})^2$  of that term, multiplied by the % explained of residual sum of squares by that PLS dimension. The accumulated (over all PLS dimensions) value,  $\text{VIP}_k = \Sigma (\text{VIN})_k^2$  is then divided by the total percent explained of residual sum of squares by the PLS model and multiplied by the number of terms in the model.

## Figure S1. Permutation plots

In PLS  $Q^2$  assesses the predictive power of the model and a permutation plot is a further chemoinformatic tool to check the significance of a PLS model and the reliability of its Y-predictions. In fact the purpose of this validation tool is to compare the goodness of fit ( $R^2$  and  $Q^2$ ) of the original model with the goodness of fit of several models based on data where the order of the Y-observations has been randomly permuted, while the X-matrix has been kept intact. The permutation plot [32] below shows  $R^2$  and  $Q^2$  values on the vertical axis for the parental PLS model (far to the right) and the Y-permuted models parameters on the left. The horizontal axis shows the correlation between the permuted Y-vectors and the original Y-vector. The original parameters have correlation 1 with themselves.

In order to have a valid plot, some important criteria are requested:

1. All  $Q^2$ -values on the left should be lower than the original points to the right.
2. The  $R^2$  intercept should be less than 0.4.
3. The regression line of the  $Q^2$ -points should intersect the vertical axis (on the left) at or below zero.

The plot below was obtained by considering 50 random PLS models, and strongly indicates that Cp correlation model can be considered valid.

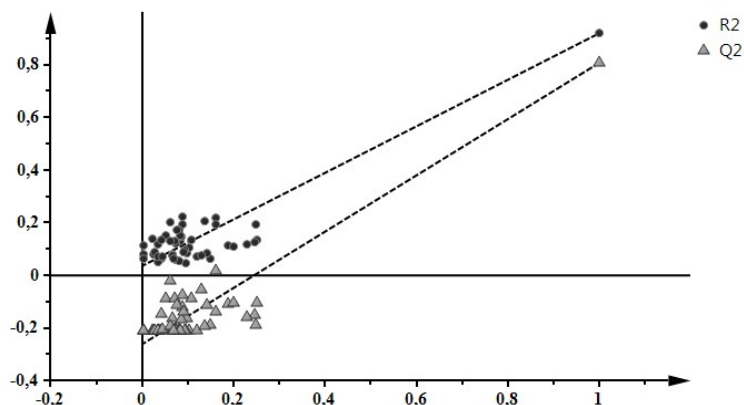

Fig. S1

## Synthesis and characterization of test set ILs

### Materials

Commercially available compounds were used directly without any preliminary treatment. 1-Butyl-3-methylimidazolium tetrafluoroborate was purchased from Sigma-Aldrich. 1-Butyl-3-methylimidazolium tricyanomethanide, 1-butyl-3-methylimidazolium dimethylphosphate 1-butyl-4-methylpyridinium tricyanomethanide, 1-butyl-4-methylpyridinium chloride and 1-hexyl-3-methylimidazolium chloride were purchased from Io.Li.Tec. Solvents, HBF<sub>4</sub> solution (50/50, w/w) and Amberlite IRA-400 resin were used as purchased without further purification.

**Synthesis of 1-butyl-4-methylpyridinium tetrafluoroborate (IL 331).** 2 g (10.7 mmol) of 1-butyl-4-methylpyridinium chloride were dissolved in 30 mL of anhydrous CH<sub>2</sub>Cl<sub>2</sub> under Argon atmosphere, and 1.17 g (10.7 mmol) of NaBF<sub>4</sub> were added. The solution was stirred for 24h. The suspension was filtered and washed with anhydrous dichloromethane to remove the precipitated sodium chloride salt, then the organic phase was filtered on alumina and charcoal (to remove residual impurities) and washed with small volumes of water. The absence of residual halides was verified by silver nitrate test. The solvent was removed *in vacuo* and no further treatments were needed. The organic salt was recovered with 80.8 % of yield, and the structure confirmed by the NMR spectra in agreement with literature data [34].

**Synthesis of 1-butyl-3-methylimidazolium acetate (IL 511) and 1-hexyl-3-methylimidazolium salts (tetrafluoroborate, acetate and trifluoroacetate) (ILs 196, 512, 513).** The general procedure for the synthesis of these ionic liquids from the relevant halides is reported below. The Amberlite resin IRA-400 (16 g) was converted from chloride form to hydroxide form by eluting an aqueous solution of NaOH (10 mL, 10% w/v) within a column. Subsequently the resin was washed with water until the eluate was neutral. The halide salt(s) (10 mmol), dissolved in methanol/water (70/30, v/v), was eluted, and the eluate collected into a flask containing a solution of the corresponding acid in stoichiometric amount, until neutralization. The resulting solution was concentrated *in vacuo*, then treated with activated charcoal in ethanol. Filtration and removal of the solvent afforded the ionic liquids as viscous oils in high to quantitative yields. The products structures were confirmed by NMR spectra and are in agreement with literature data [35-38].

#### *1-Hexyl-3-methylimidazolium tetrafluoroborate*

Pale yellow oil. Yield: 100%

$^1\text{H}$  NMR (300 MHz,  $\text{CDCl}_3$ ):  $\delta$ =8.70 (s, 1 H), 7.21 (d,  $J$ =14 Hz, 2 H), 4.17 (t,  $J$ =6 Hz, 2 H), 3.94 (s, 3 H), 1.87 (m, 2 H), 1.31 (m, 6 H), 0.87 (t,  $J$ =6 Hz, 3 H) ppm.

$^{13}\text{C}$  NMR (300 MHz,  $\text{CDCl}_3$ ):  $\delta$ = 135.8, 123.4, 121.9, 50.0, 36.2, 31.1, 29.0, 25.9, 22.3, 13.8 ppm [34].

#### *1-Hexyl-3-methylimidazolium acetate*

Pale yellow oil. Yield: 99%

$^1\text{H}$  NMR (300 MHz,  $d_6$ -DMSO):  $\delta$ =9.44 (s, 1 H), 7.74 (d,  $J$ =24 Hz, 2 H), 4.15 (t,  $J$ =7 Hz, 2 H), 3.85 (s, 3 H), 1.77 (quint,  $J$ =6.8 Hz, 2 H), 1.56 (s, 3 H), 1.26 (m, 6 H), 0.85 (t,  $J$ =7 Hz, 3 H) ppm.  $^{13}\text{C}$  NMR (300 MHz,  $d_6$ -DMSO)  $\delta$ = 173.8, 137.9, 124.1, 122.0, 49.0, 36.0, 31.1, 30.2, 29.8, 25.9, 24.6, 22.4 ppm [38].

#### *1-Hexyl-3-methylimidazolium trifluoroacetate*

Pale yellow oil. Yield: 96%

$^1\text{H}$  NMR (300 MHz,  $d_6$ -DMSO):  $\delta$ =9.15 (s, 1 H), 7.74 (d,  $J$ =26 Hz, 2 H), 4.13 (t,  $J$ =8 Hz, 2 H), 3.82 (s, 3 H), 1.73 (quint,  $J$ =8 Hz, 2 H), 1.25 (m, 6 H), 0.85 (t,  $J$ =7 Hz, 3 H) ppm.  $^{13}\text{C}$  NMR (300 MHz,  $d_6$ -DMSO):  $\delta$ = 158.0, 137.2, 124.1, 122.1, 49.24, 36.1, 30.9, 30.2, 29.9, 25.6, 22.3, 14.2 ppm [36].

## Heat capacity measurements

The heat capacities were measured by means of DSC analysis carrying out experiments on a Linseis STA PT 1600 instrument at atmospheric pressure. over the temperature ranging from. Samples ( $20.0 \pm 0.1$  mg) were heated in a platinum sample boat up. In accordance with Chiu [33] a method was created to hold isothermally at the desired starting temperature (298K) for 10 min, then heating at  $5^\circ\text{K}/\text{min}$  up to  $353^\circ\text{K}$ , then holding at this temperature for 10 min. The purge gas used was nitrogen with a flow rate of 50 cc/min. Water was used as standard to check the heat capacity measurements according to the method reported by Chiu [33].

$C_p$  values measured in the present work are in excellent agreement with values reported in the literature (see Table 1), with differences of 6%, 5% and 2% for ILs 511, 196 and 331 respectively.

**Table S1.** Cp PLS predictions. DModX values higher than 1.60 corresponding to 95% c.l. [32] marked in red indicate a high distance from the learning set domain.

| entry | IL code                 | PP1+  | PP2+  | PP3+  | PP4+ | PP5+  | PP1-  | PP2-  | PP3-  | PP4-  | Y: Cp<br>J/(K*mol) | Ŷ: Cp pred.<br>J/(K*mol) | DModX | Systematic name                                                                                                   |
|-------|-------------------------|-------|-------|-------|------|-------|-------|-------|-------|-------|--------------------|--------------------------|-------|-------------------------------------------------------------------------------------------------------------------|
| 1     | Py4-2Me BF4             | 0.27  | -6.91 | 3.51  | 0.08 | -0.72 | 1.67  | -0.06 | -0.33 | -3.83 |                    | 392                      | 0.83  | 1-Butyl-2-methylpyridinium tetrafluoroborate                                                                      |
| 2     | Py4-2Me Cl              | 0.27  | -6.91 | 3.51  | 0.08 | -0.72 | -0.57 | -5.73 | -2.31 | -1.25 |                    | 265                      | 0.93  | 1-Butyl-2-methylpyridinium chloride                                                                               |
| 3     | Pyr12 2OSO3             | 4.57  | -4.49 | -4.03 | 5.55 | 0.10  | 1.13  | -1.47 | -0.18 | -0.39 |                    | 434                      | 1.90  | 1-Ethyl-1-methylpyrrolidinium ethyl sulfate                                                                       |
| 4     | Pyr11CN (CF3SO2)2N      | 6.95  | 0.11  | -2.58 | 2.04 | -0.06 | -1.19 | -2.15 | 2.86  | 2.10  |                    | 430                      | 1.79  | 1-(Cyanomethyl)-1-methylpyrrolidinium 1,1,1-trifluoro-N-<br>[(trifluoromethyl)sulfonyl]methanesulfonamide         |
| 5     | Pyr11CN Cl              | 6.95  | 0.11  | -2.58 | 2.04 | -0.06 | -0.57 | -5.73 | -2.31 | -1.25 |                    | 151                      | 1.61  | 1-(Cyanomethyl)-1-methylpyrrolidinium chloride                                                                    |
| 6     | Pyr11COO2<br>(CF3SO2)2N | 7.17  | 1.90  | -2.39 | 4.75 | -1.11 | -1.19 | -2.15 | 2.86  | 2.10  |                    | 420                      | 2.48  | 1-(2-Ethoxy-2-oxoethyl)-1-methylpyrrolidinium 1,1,1-trifluoro-N-<br>[(trifluoromethyl)sulfonyl]methanesulfonamide |
| 7     | Pyr11COO2 Br            | 7.17  | 1.90  | -2.39 | 4.75 | -1.11 | -0.52 | -5.52 | -2.16 | -1.13 |                    | 151                      | 2.35  | 1-(2-Ethoxy-2-oxoethyl)-1-methylpyrrolidinium bromide                                                             |
| 8     | Pyr11COO2<br>(C2F5)3PF3 | 7.17  | 1.90  | -2.39 | 4.75 | -1.11 | 2.83  | 3.03  | 4.77  | -1.46 |                    | 534                      | 3.00  | 1-(2-Ethoxy-2-oxoethyl)-1-methylpyrrolidinium<br>tris(pentafluoroethyl)trifluorophosphate                         |
| 9     | Pyr13 PF6               | 3.13  | -4.34 | -3.85 | 5.63 | -0.10 | 1.13  | -1.14 | -0.21 | -3.53 |                    | 416                      | 1.96  | 1-Methyl-1-propylpyrrolidinium hexafluorophosphate                                                                |
| 10    | Pyr14 Cl                | 1.96  | -4.12 | -3.78 | 5.67 | -0.03 | -0.57 | -5.73 | -2.31 | -1.25 |                    | 329                      | 1.85  | 1-Butyl-1-methylpyrrolidinium chloride                                                                            |
| 11    | Pyr14 (C2F5)3PF3        | 1.96  | -4.12 | -3.78 | 5.67 | -0.03 | 2.83  | 3.03  | 4.77  | -1.46 | 769 <sup>a</sup>   | 723                      | 2.04  | 1-Butyl-1-methylpyrrolidinium trifluorotris(pentafluoroethyl)phosphate                                            |
| 12    | Pyr14 (CF3SO2)2N        | 1.96  | -4.12 | -3.78 | 5.67 | -0.03 | -1.19 | -2.15 | 2.86  | 2.10  | 588 <sup>a</sup>   | 608                      | 1.75  | 1-Butyl-1-methylpyrrolidinium 1,1,1-trifluoro-N-<br>[(trifluoromethyl)sulfonyl]methanesulfonamide                 |
| 13    | Pyr14 1OSO3             | 1.96  | -4.12 | -3.78 | 5.67 | -0.03 | 1.36  | -1.16 | -0.44 | -1.31 |                    | 474                      | 1.84  | 1-Butyl-1-methylpyrrolidinium methyl sulfate                                                                      |
| 14    | Pyr14 BF4               | 1.96  | -4.12 | -3.78 | 5.67 | -0.03 | 1.67  | -0.06 | -0.33 | -3.83 |                    | 456                      | 2.00  | 1-Butyl-1-methylpyrrolidinium tetrafluoroborate                                                                   |
| 15    | Pyr14 Br                | 1.96  | -4.12 | -3.78 | 5.67 | -0.03 | -0.52 | -5.52 | -2.16 | -1.13 |                    | 339                      | 1.84  | 1-Butyl-1-methylpyrrolidinium bromide                                                                             |
| 16    | Pyr14 N(CN)2            | 1.96  | -4.12 | -3.78 | 5.67 | -0.03 | -2.48 | 0.49  | 0.00  | 0.73  |                    | 518                      | 1.82  | 1-Butyl-1-methylpyrrolidinium N-cyanocyanamide                                                                    |
| 17    | Pyr16 (CF3SO2)2N        | 0.02  | -3.63 | -3.89 | 5.63 | 0.25  | -1.19 | -2.15 | 2.86  | 2.10  |                    | 660                      | 1.64  | 1-Hexyl-1-methylpyrrolidinium 1,1,1-trifluoro-N-<br>[(trifluoromethyl)sulfonyl]methanesulfonamide                 |
| 18    | Pyr16 Cl                | 0.02  | -3.63 | -3.89 | 5.63 | 0.25  | -0.57 | -5.73 | -2.31 | -1.25 |                    | 381                      | 1.87  | 1-Hexyl-1-methylpyrrolidinium chloride                                                                            |
| 19    | Pyr18 BF4               | -2.33 | -3.03 | -3.71 | 5.36 | 0.63  | 1.67  | -0.06 | -0.33 | -3.83 |                    | 568                      | 2.03  | 1-Methyl-1-octylpyrrolidinium tetrafluoroborate                                                                   |
| 20    | Pyr18 Cl                | -2.33 | -3.03 | -3.71 | 5.36 | 0.63  | -0.57 | -5.73 | -2.31 | -1.25 |                    | 441                      | 1.85  | 1-Methyl-1-octylpyrrolidinium chloride                                                                            |
| 21    | Pyr13OH (CF3SO2)2N      | 10.38 | 4.48  | -2.99 | 1.65 | 3.25  | -1.19 | -2.15 | 2.86  | 2.10  |                    | 432                      | 2.69  | 1-(3-Hydroxypropyl)-1-methylpyrrolidinium 1,1,1-trifluoro-N-<br>[(trifluoromethyl)sulfonyl]methanesulfonamide     |
| 22    | Pyr13OH Cl              | 10.38 | 4.48  | -2.99 | 1.65 | 3.25  | -0.57 | -5.73 | -2.31 | -1.25 |                    | 153                      | 2.59  | 1-(3-Hydroxypropyl)-1-methylpyrrolidinium chloride                                                                |

|           |                    |       |       |       |      |       |       |       |       |       |                  |      |                                                                                                           |                                                                                               |
|-----------|--------------------|-------|-------|-------|------|-------|-------|-------|-------|-------|------------------|------|-----------------------------------------------------------------------------------------------------------|-----------------------------------------------------------------------------------------------|
| <b>23</b> | Pyr13O1 (CF3SO2)2N | 5.81  | -0.16 | -3.72 | 4.31 | 0.62  | -1.19 | -2.15 | 2.86  | 2.10  | 509              | 1.95 | 1-(3-Methoxypropyl)-1-methylpyrrolidinium 1,1,1-trifluoro-N-[(trifluoromethyl)sulfonyl]methanesulfonamide |                                                                                               |
| <b>24</b> | Pyr13O1 Cl         | 5.81  | -0.16 | -3.72 | 4.31 | 0.62  | -0.57 | -5.73 | -2.31 | -1.25 | 229              | 1.92 | 1-(3-Methoxypropyl)-1-methylpyrrolidinium chloride                                                        |                                                                                               |
| <b>25</b> | Pyr12OH (CF3SO2)2N | 11.45 | 4.49  | -2.64 | 1.01 | 3.23  | -1.19 | -2.15 | 2.86  | 2.10  | 398              | 2.74 | 1-(2-Hydroxyethyl)-1-methylpyrrolidinium 1,1,1-trifluoro-N-[(trifluoromethyl)sulfonyl]methanesulfonamide  |                                                                                               |
| <b>26</b> | Pyr12OH I          | 11.45 | 4.49  | -2.64 | 1.01 | 3.23  | -0.65 | -5.31 | -1.63 | -1.12 | 150              | 2.61 | 1-(2-Hydroxyethyl)-1-methylpyrrolidinium iodide                                                           |                                                                                               |
| <b>27</b> | Pyr12O1 (CF3SO2)2N | 7.36  | -0.19 | -3.63 | 4.10 | 0.85  | -1.19 | -2.15 | 2.86  | 2.10  | 477              | 2.01 | 1-(2-Methoxyethyl)-1-methylpyrrolidinium 1,1,1-trifluoro-N-[(trifluoromethyl)sulfonyl]methanesulfonamide  |                                                                                               |
| <b>28</b> | Pyr12O1 (C2F5)3PF3 | 7.36  | -0.19 | -3.63 | 4.10 | 0.85  | 2.83  | 3.03  | 4.77  | -1.46 | 592              | 2.64 | 1-(2-Methoxyethyl)-1-methylpyrrolidinium tris(pentafluoroethyl)trifluorophosphate                         |                                                                                               |
| <b>29</b> | Pyr12O1 Cl         | 7.36  | -0.19 | -3.63 | 4.10 | 0.85  | -0.57 | -5.73 | -2.31 | -1.25 | 198              | 1.94 | 1-(2-Methoxyethyl)-1-methylpyrrolidinium chloride                                                         |                                                                                               |
| <b>30</b> | Pyr12O2 (CF3SO2)2N | 5.75  | -0.56 | -3.73 | 5.02 | 0.54  | -1.19 | -2.15 | 2.86  | 2.10  | 518              | 2.00 | 1-(2-Ethoxyethyl)-1-methylpyrrolidinium 1,1,1-trifluoro-N-[(trifluoromethyl)sulfonyl]methanesulfonamide   |                                                                                               |
| <b>31</b> | Pyr12O2 Br         | 5.75  | -0.56 | -3.73 | 5.02 | 0.54  | -0.52 | -5.52 | -2.16 | -1.13 | 249              | 2.00 | 1-(2-Ethoxyethyl)-1-methylpyrrolidinium bromide                                                           |                                                                                               |
| <b>32</b> | Pyr11O2 (CF3SO2)2N | 5.12  | -1.38 | -4.24 | 5.38 | 0.11  | -1.19 | -2.15 | 2.86  | 2.10  | 528              | 2.04 | 1-(Ethoxymethyl)-1-methylpyrrolidinium 1,1,1-trifluoro-N-[(trifluoromethyl)sulfonyl]methanesulfonamide    |                                                                                               |
| <b>33</b> | Pyr11O2 Cl         | 5.12  | -1.38 | -4.24 | 5.38 | 0.11  | -0.57 | -5.73 | -2.31 | -1.25 | 249              | 2.05 | 1-(Ethoxymethyl)-1-methylpyrrolidinium chloride                                                           |                                                                                               |
| <b>34</b> | Pip11CN (CF3SO2)2N | 5.85  | 0.24  | -2.52 | 1.66 | 0.09  | -1.19 | -2.15 | 2.86  | 2.10  | 455              | 1.69 | 1-(Cyanomethyl)-1-methylpiperidinium 1,1,1-trifluoro-N-[(trifluoromethyl)sulfonyl]methanesulfonamide      |                                                                                               |
| <b>35</b> | Pip11CN Cl         | 5.85  | 0.24  | -2.52 | 1.66 | 0.09  | -0.57 | -5.73 | -2.31 | -1.25 | 175              | 1.54 | 1-(Cyanomethyl)-1-methylpiperidinium chloride                                                             |                                                                                               |
| <b>36</b> | Pip13 (CF3SO2)2N   | 2.18  | -4.18 | -3.94 | 5.90 | -0.26 | -1.19 | -2.15 | 2.86  | 2.10  | 607 <sup>a</sup> | 600  | 1.84                                                                                                      | 1-Methyl-1-propylpiperidinium 1,1,1-trifluoro-N-[(trifluoromethyl)sulfonyl]methanesulfonamide |
| <b>37</b> | Pip13 PF6          | 2.18  | -4.18 | -3.94 | 5.90 | -0.26 | 1.13  | -1.14 | -0.21 | -3.53 | 436              | 2.00 | 1-Methyl-1-propylpiperidinium hexafluorophosphate                                                         |                                                                                               |
| <b>38</b> | Pip14 (CF3SO2)2N   | 1.15  | -3.97 | -3.95 | 5.81 | -0.09 | -1.19 | -2.15 | 2.86  | 2.10  | 627              | 1.73 | 1-Butyl-1-methylpiperidinium 1,1,1-trifluoro-N-[(trifluoromethyl)sulfonyl]methanesulfonamide              |                                                                                               |
| <b>39</b> | Pip14 Br           | 1.15  | -3.97 | -3.95 | 5.81 | -0.09 | -0.52 | -5.52 | -2.16 | -1.13 | 358              | 1.90 | 1-Butyl-1-methylpiperidinium bromide                                                                      |                                                                                               |
| <b>40</b> | Pip13OH (CF3SO2)2N | 9.27  | 4.69  | -2.96 | 1.70 | 3.21  | -1.19 | -2.15 | 2.86  | 2.10  | 457              | 2.63 | 1-(3-Hydroxypropyl)-1-methylpiperidinium 1,1,1-trifluoro-N-[(trifluoromethyl)sulfonyl]methanesulfonamide  |                                                                                               |
| <b>41</b> | Pip13OH Cl         | 9.27  | 4.69  | -2.96 | 1.70 | 3.21  | -0.57 | -5.73 | -2.31 | -1.25 | 177              | 2.55 | 1-(3-Hydroxypropyl)-1-methylpiperidinium chloride                                                         |                                                                                               |
| <b>42</b> | Pip13O1 (CF3SO2)2N | 4.88  | 0.03  | -3.74 | 4.40 | 0.67  | -1.19 | -2.15 | 2.86  | 2.10  | 532              | 1.92 | 1-(3-Methoxypropyl)-1-methylpiperidinium 1,1,1-trifluoro-N-[(trifluoromethyl)sulfonyl]methanesulfonamide  |                                                                                               |
| <b>43</b> | Pip13O1 Cl         | 4.88  | 0.03  | -3.74 | 4.40 | 0.67  | -0.57 | -5.73 | -2.31 | -1.25 | 253              | 1.93 | 1-(3-Methoxypropyl)-1-methylpiperidinium chloride                                                         |                                                                                               |
| <b>44</b> | Pip12OH (CF3SO2)2N | 10.68 | 4.70  | -2.87 | 1.16 | 3.53  | -1.19 | -2.15 | 2.86  | 2.10  | 427              | 2.74 | 1-(2-Hydroxyethyl)-1-methylpiperidinium 1,1,1-trifluoro-N-[(trifluoromethyl)sulfonyl]methanesulfonamide   |                                                                                               |
| <b>45</b> | Pip12OH I          | 10.68 | 4.70  | -2.87 | 1.16 | 3.53  | -0.65 | -5.31 | -1.63 | -1.12 | 179              | 2.65 | 1-(2-Hydroxyethyl)-1-methylpiperidinium iodide                                                            |                                                                                               |
| <b>46</b> | Pip12O1 (CF3SO2)2N | 5.73  | -1.14 | -3.80 | 5.03 | 0.34  | -1.19 | -2.15 | 2.86  | 2.10  | 514              | 1.97 | 1-(2-Methoxyethyl)-1-methylpiperidinium 1,1,1-trifluoro-N-[(trifluoromethyl)sulfonyl]methanesulfonamide   |                                                                                               |
| <b>47</b> | Pip12O1 Br         | 5.73  | -1.14 | -3.80 | 5.03 | 0.34  | -0.52 | -5.52 | -2.16 | -1.13 | 245              | 1.95 | 1-(2-Methoxyethyl)-1-methylpiperidinium bromide                                                           |                                                                                               |
| <b>48</b> | Pip12O2 (CF3SO2)2N | 4.83  | -0.32 | -3.71 | 5.03 | 0.45  | -1.19 | -2.15 | 2.86  | 2.10  | 536              | 1.97 | 1-(2-Ethoxyethyl)-1-methylpiperidinium 1,1,1-trifluoro-N-[(trifluoromethyl)sulfonyl]methanesulfonamide    |                                                                                               |

|           |                       |       |       |       |       |       |       |       |       |       |     |      |                                                                                                          |
|-----------|-----------------------|-------|-------|-------|-------|-------|-------|-------|-------|-------|-----|------|----------------------------------------------------------------------------------------------------------|
| <b>49</b> | Pip12O2 Br            | 4.83  | -0.32 | -3.71 | 5.03  | 0.45  | -0.52 | -5.52 | -2.16 | -1.13 | 267 | 1.99 | 1-(2-Ethoxyethyl)-1-methylpiperidinium bromide                                                           |
| <b>50</b> | Pip11O2 (CF3SO2)2N    | 3.80  | -1.20 | -4.17 | 5.21  | 0.01  | -1.19 | -2.15 | 2.86  | 2.10  | 553 | 1.95 | 1-(Ethoxymethyl)-1-methylpiperidinium 1,1,1-trifluoro-N-[(trifluoromethyl)sulfonyl]methanesulfonamide    |
| <b>51</b> | Pip11O2 Cl            | 3.80  | -1.20 | -4.17 | 5.21  | 0.01  | -0.57 | -5.73 | -2.31 | -1.25 | 273 | 2.00 | 1-(Ethoxymethyl)-1-methylpiperidinium chloride                                                           |
| <b>52</b> | Mor12 4MePhSO3        | 8.90  | -0.32 | -3.78 | 4.51  | 0.50  | -1.66 | -1.59 | 2.48  | 3.83  | 456 | 2.23 | 4-Ethyl-4-methylmorpholinium 4-methylbenzenesulfonate                                                    |
| <b>53</b> | Mor11CN (CF3SO2)2N    | 9.29  | 3.51  | -1.23 | 1.82  | -0.65 | -1.19 | -2.15 | 2.86  | 2.10  | 340 | 2.54 | 4-(Cyanomethyl)-4-methylmorpholinium 1,1,1-trifluoro-N-[(trifluoromethyl)sulfonyl]methanesulfonamide     |
| <b>54</b> | Mor11CN Cl            | 9.29  | 3.51  | -1.23 | 1.82  | -0.65 | -0.57 | -5.73 | -2.31 | -1.25 | 61  | 2.29 | 4-(Cyanomethyl)-4-methylmorpholinium chloride                                                            |
| <b>55</b> | Mor14 (CF3SO2)2N      | 6.23  | 0.06  | -3.73 | 3.90  | 0.91  | -1.19 | -2.15 | 2.86  | 2.10  | 502 | 1.94 | 4-Butyl-4-methylmorpholinium 1,1,1-trifluoro-N-[(trifluoromethyl)sulfonyl]methanesulfonamide             |
| <b>56</b> | Mor14 Br              | 6.23  | 0.06  | -3.73 | 3.90  | 0.91  | -0.52 | -5.52 | -2.16 | -1.13 | 233 | 1.91 | 4-Butyl-4-methylmorpholinium bromide                                                                     |
| <b>57</b> | Mor13OH (CF3SO2)2N    | 12.12 | 7.62  | -1.88 | 2.42  | 2.48  | -1.19 | -2.15 | 2.86  | 2.10  | 364 | 3.32 | 4-(3-Hydroxypropyl)-4-methylmorpholinium 1,1,1-trifluoro-N-[(trifluoromethyl)sulfonyl]methanesulfonamide |
| <b>58</b> | Mor13OH Cl            | 12.12 | 7.62  | -1.88 | 2.42  | 2.48  | -0.57 | -5.73 | -2.31 | -1.25 | 85  | 3.17 | 4-(3-Hydroxypropyl)-4-methylmorpholinium chloride                                                        |
| <b>59</b> | Mor13O1 (CF3SO2)2N    | 7.79  | 2.32  | -2.66 | 5.24  | -0.19 | -1.19 | -2.15 | 2.86  | 2.10  | 438 | 2.53 | 4-(3-Methoxypropyl)-4-methylmorpholinium 1,1,1-trifluoro-N-[(trifluoromethyl)sulfonyl]methanesulfonamide |
| <b>60</b> | Mor13O1 Cl            | 7.79  | 2.32  | -2.66 | 5.24  | -0.19 | -0.57 | -5.73 | -2.31 | -1.25 | 159 | 2.43 | 4-(3-Methoxypropyl)-4-methylmorpholinium chloride                                                        |
| <b>61</b> | Mor12OH (CF3SO2)2N    | 13.05 | 7.64  | -1.48 | 2.13  | 2.17  | -1.19 | -2.15 | 2.86  | 2.10  | 329 | 3.38 | 4-(2-Hydroxyethyl)-4-methylmorpholinium 1,1,1-trifluoro-N-[(trifluoromethyl)sulfonyl]methanesulfonamide  |
| <b>62</b> | Mor12OH I             | 13.05 | 7.64  | -1.48 | 2.13  | 2.17  | -0.65 | -5.31 | -1.63 | -1.12 | 81  | 3.21 | 4-(2-Hydroxyethyl)-4-methylmorpholinium iodide                                                           |
| <b>63</b> | Mor12O1 (CF3SO2)2N    | 9.02  | 2.70  | -2.46 | 5.23  | -0.32 | -1.19 | -2.15 | 2.86  | 2.10  | 404 | 2.67 | 4-(2-Methoxyethyl)-4-methylmorpholinium 1,1,1-trifluoro-N-[(trifluoromethyl)sulfonyl]methanesulfonamide  |
| <b>64</b> | Mor12O1 Cl            | 9.02  | 2.70  | -2.46 | 5.23  | -0.32 | -0.57 | -5.73 | -2.31 | -1.25 | 125 | 2.54 | 4-(2-Methoxyethyl)-4-methylmorpholinium chloride                                                         |
| <b>65</b> | Mor12O2 (CF3SO2)2N    | 8.20  | 2.70  | -2.65 | 4.89  | 0.06  | -1.19 | -2.15 | 2.86  | 2.10  | 431 | 2.54 | 4-(2-Ethoxyethyl)-4-methylmorpholinium 1,1,1-trifluoro-N-[(trifluoromethyl)sulfonyl]methanesulfonamide   |
| <b>66</b> | Mor12O2 Br            | 8.20  | 2.70  | -2.65 | 4.89  | 0.06  | -0.52 | -5.52 | -2.16 | -1.13 | 162 | 2.44 | 4-(2-Ethoxyethyl)-4-methylmorpholinium bromide                                                           |
| <b>67</b> | Mor11O2 (CF3SO2)2N    | 8.27  | 2.53  | -3.27 | 4.62  | -0.47 | -1.19 | -2.15 | 2.86  | 2.10  | 413 | 2.61 | 4-(Ethoxymethyl)-4-methylmorpholinium 1,1,1-trifluoro-N-[(trifluoromethyl)sulfonyl]methanesulfonamide    |
| <b>68</b> | Mor11O2 Cl            | 8.27  | 2.53  | -3.27 | 4.62  | -0.47 | -0.57 | -5.73 | -2.31 | -1.25 | 133 | 2.47 | 4-(Ethoxymethyl)-4-methylmorpholinium chloride                                                           |
| <b>69</b> | IM11COO3-2Me 8OSO3    | 5.13  | 2.76  | 0.82  | 1.26  | -2.57 | -1.48 | -1.82 | 3.86  | 4.62  | 445 | 2.68 | 1,2-Dimethyl-3-(2-oxo-2-propoxyethyl)imidazolium octylsulfate                                            |
| <b>70</b> | IM11COO3-2Me Br       | 5.13  | 2.76  | 0.82  | 1.26  | -2.57 | -0.52 | -5.52 | -2.16 | -1.13 | 99  | 2.34 | 1,2-Dimethyl-3-(2-oxo-2-propoxyethyl)imidazolium bromide                                                 |
| <b>71</b> | IM11COO5-2Me 8OSO3    | 2.60  | 3.30  | 0.45  | 1.76  | -2.70 | -1.48 | -1.82 | 3.86  | 4.62  | 505 | 2.75 | 1,2-Dimethyl-3-[2-oxo-2-(pentyloxy)ethyl]imidazolium octylsulfate                                        |
| <b>72</b> | IM11COO5-2Me Br       | 2.60  | 3.30  | 0.45  | 1.76  | -2.70 | -0.52 | -5.52 | -2.16 | -1.13 | 159 | 2.52 | 1,2-Dimethyl-3-[2-oxo-2-(pentyloxy)ethyl]imidazolium bromide                                             |
| <b>73</b> | IM1gly-2Me N(NC)2     | 12.79 | 9.75  | 2.58  | -6.27 | 5.14  | -2.48 | 0.49  | 0.00  | 0.73  | 212 | 4.31 | 1,2-dimethyl-3-glycerylimidazolium dicyanamide                                                           |
| <b>74</b> | IM1gly-2Me (CF3SO2)2N | 12.79 | 9.75  | 2.58  | -6.27 | 5.14  | -1.19 | -2.15 | 2.86  | 2.10  | 302 | 4.24 | 1,2-dimethyl-3-glycerylimidazolium 1,1,1-trifluoro-N-[(trifluoromethyl)sulfonyl]methanesulfonamide       |

|            |                                    |       |       |      |       |       |        |       |       |       |                    |      |                                                                                                     |                                                                                                 |
|------------|------------------------------------|-------|-------|------|-------|-------|--------|-------|-------|-------|--------------------|------|-----------------------------------------------------------------------------------------------------|-------------------------------------------------------------------------------------------------|
| <b>75</b>  | IM14-2Me<br>(CF3SO2)2N             | 1.01  | -5.58 | 0.95 | 1.99  | -0.19 | -1.19  | -2.15 | 2.86  | 2.10  | 570                | 0.51 | 1-Butyl-2,3-dimethylimidazolium 1,1,1-trifluoro-N-<br>[(trifluoromethyl)sulfonyl]methanesulfonamide |                                                                                                 |
| <b>76</b>  | IM14-2Me BF4                       | 1.01  | -5.58 | 0.95 | 1.99  | -0.19 | 1.67   | -0.06 | -0.33 | -3.83 | 418                | 0.81 | 1-Butyl-2,3-dimethylimidazolium tetrafluoroborate                                                   |                                                                                                 |
| <b>77</b>  | IM14-2Me CF3SO3                    | 1.01  | -5.58 | 0.95 | 1.99  | -0.19 | 1.41   | -0.86 | 0.07  | -2.60 | 437                | 0.60 | 1-Butyl-2,3-dimethylimidazolium trifluoromethanesulfonate                                           |                                                                                                 |
| <b>78</b>  | IM16-2Me BF4                       | -2.67 | -6.14 | 4.17 | -0.99 | 0.57  | 1.67   | -0.06 | -0.33 | -3.83 | 482                | 1.41 | 1-Hexyl-2,3-dimethylimidazolium tetrafluoroborate                                                   |                                                                                                 |
| <b>79</b>  | IM16-2Me<br>(CF3SO2)2N             | -2.67 | -6.14 | 4.17 | -0.99 | 0.57  | -1.19  | -2.15 | 2.86  | 2.10  | 686 <sup>a</sup>   | 634  | 1.21                                                                                                | 1-hexyl-2,3-dimethylimidazolium bis(trifluoromethylsulphonyl)imide                              |
| <b>80</b>  | IM12OH-2Me Cl                      | 9.21  | 2.25  | 3.25 | -4.16 | 2.37  | -0.57  | -5.73 | -2.31 | -1.25 | 71                 | 2.31 | 1-(2-hydroxyethyl)-2,3-dimethylimidazolium chloride                                                 |                                                                                                 |
| <b>81</b>  | IM11 (CF3SO2)2N                    | 4.18  | -6.87 | 0.65 | 1.98  | -1.80 | -1.19  | -2.15 | 2.86  | 2.10  | 454                | 1.10 | 1,3-Dimethylimidazolium 1,1,1-trifluoro-N-<br>[(trifluoromethyl)sulfonyl]methanesulfonamide         |                                                                                                 |
| <b>82</b>  | IM11 1OSO3                         | 4.18  | -6.87 | 0.65 | 1.98  | -1.80 | 1.36   | -1.16 | -0.44 | -1.31 | 319                | 0.52 | 1,3-dimethylimidazolium methylsulfate                                                               |                                                                                                 |
| <b>83</b>  | IM11 4MePhSO3                      | 4.18  | -6.87 | 0.65 | 1.98  | -1.80 | -1.66  | -1.59 | 2.48  | 3.83  | 473                | 1.26 | 1,3-dimethylimidazolium 4-methylbenzenesulfonate                                                    |                                                                                                 |
| <b>84</b>  | IM11 N(CN)2                        | 4.18  | -6.87 | 0.65 | 1.98  | -1.80 | -2.48  | 0.49  | 0.00  | 0.73  | 363                | 1.04 | 1,3-dimethylimidazolium N-cyanocyanamide                                                            |                                                                                                 |
| <b>85</b>  | IM11(COO1)(Ph-(3,4-<br>OCH2O-)) Cl | 2.18  | 6.00  | 3.93 | -0.16 | -6.28 | -0.57  | -5.73 | -2.31 | -1.25 | 8                  | 4.19 | 1-[1-(1,3-Benzodioxol-5-yl)-2-methoxy-2-oxoethyl]-3-<br>methylimidazolium chloride                  |                                                                                                 |
| <b>86</b>  | IM11(COO4)(Ph-(3,4-<br>OCH2O-)) Br | 0.12  | 7.31  | 1.19 | 2.24  | -4.78 | -0.52  | -5.52 | -2.16 | -1.13 | 144                | 4.03 | 1-[1-(1,3-Benzodioxol-5-yl)-2-butoxy-2-oxoethyl]-3-methylimidazolium<br>bromide                     |                                                                                                 |
| <b>87</b>  | IM12 (C2F5)3PF3                    | 3.24  | -6.75 | 0.93 | 1.70  | -1.60 | 2.83   | 3.03  | 4.77  | -1.46 | 591                | 0.93 | 1-Ethyl-3-methylimidazolium trifluorotris(pentafluoroethyl)phosphate                                |                                                                                                 |
| <b>88</b>  | IM12 (C2F5)2PO2                    | 3.24  | -6.75 | 0.93 | 1.70  | -1.60 | 1.54   | 0.08  | 2.75  | -1.62 | 466                | 0.65 | 1-Ethyl-3-methylimidazolium bis(pentafluoroethyl)phosphinate                                        |                                                                                                 |
| <b>89</b>  | IM12 C(CN)3                        | 3.24  | -6.75 | 0.93 | 1.70  | -1.60 | -13.16 | 6.89  | -1.96 | -0.13 | 324                | 3.30 | 1-Ethyl-3-methylimidazolium, salt with methanetricarbonitrile                                       |                                                                                                 |
| <b>90</b>  | IM12 B(CN)4                        | 3.24  | -6.75 | 0.93 | 1.70  | -1.60 | -10.53 | 7.57  | -0.53 | -2.02 | 373                | 2.95 | 1-Ethyl-3-methylimidazolium tetracyanoborate                                                        |                                                                                                 |
| <b>91</b>  | IM12 N(CN)2                        | 3.24  | -6.75 | 0.93 | 1.70  | -1.60 | -2.48  | 0.49  | 0.00  | 0.73  | 314.6 <sup>b</sup> | 386  | 0.96                                                                                                | 1-Ethyl-3-methylimidazolium N-cyanocyanamide                                                    |
| <b>92</b>  | IM12 (CF3SO2)2N                    | 3.24  | -6.75 | 0.93 | 1.70  | -1.60 | -1.19  | -2.15 | 2.86  | 2.10  | 506.5 <sup>a</sup> | 477  | 1.00                                                                                                | 1-Ethyl-3-methylimidazolium 1,1,1-trifluoro-N-<br>[(trifluoromethyl)sulfonyl]methanesulfonamide |
| <b>93</b>  | IM12 Cl                            | 3.24  | -6.75 | 0.93 | 1.70  | -1.60 | -0.57  | -5.73 | -2.31 | -1.25 | 235 <sup>b</sup>   | 197  | 0.73                                                                                                | 1-Ethyl-3-methylimidazolium chloride                                                            |
| <b>94</b>  | IM12 2OSO3                         | 3.24  | -6.75 | 0.93 | 1.70  | -1.60 | 1.13   | -1.47 | -0.18 | -0.39 | 382.8 <sup>a</sup> | 358  | 0.43                                                                                                | 1-Ethyl-3-methylimidazolium ethyl sulfate                                                       |
| <b>95</b>  | IM12 (OOCOO)2B                     | 3.24  | -6.75 | 0.93 | 1.70  | -1.60 | 4.60   | 5.52  | 0.02  | -0.26 | 494                | 1.10 | 1-Ethyl-3-methylimidazolium bis[ethanedioato-O1,O2]borate                                           |                                                                                                 |
| <b>96</b>  | IM12 1COO                          | 3.24  | -6.75 | 0.93 | 1.70  | -1.60 | 4.20   | 2.41  | -5.87 | 3.73  | 321.9 <sup>b</sup> | 304  | 1.54                                                                                                | 1-Ethyl-3-methylimidazolium acetate                                                             |
| <b>97</b>  | IM12 1O2O2OSO3                     | 3.24  | -6.75 | 0.93 | 1.70  | -1.60 | 1.54   | 0.57  | 3.67  | 1.93  | 561                | 0.84 | 1-Ethyl-3-methylimidazolium 2-(2-methoxyethoxy)ethyl sulfate                                        |                                                                                                 |
| <b>98</b>  | IM12 1OSO3                         | 3.24  | -6.75 | 0.93 | 1.70  | -1.60 | 1.36   | -1.16 | -0.44 | -1.31 | 331 <sup>b</sup>   | 342  | 0.37                                                                                                | 1-Ethyl-3-methylimidazolium methylsulfate                                                       |
| <b>99</b>  | IM12 1SO3                          | 3.24  | -6.75 | 0.93 | 1.70  | -1.60 | 1.32   | -1.45 | -0.86 | -1.35 | 345.5 <sup>b</sup> | 322  | 0.35                                                                                                | 1-Ethyl-3-methylimidazolium methanesulfonate                                                    |
| <b>100</b> | IM12 4MePhSO3                      | 3.24  | -6.75 | 0.93 | 1.70  | -1.60 | -1.66  | -1.59 | 2.48  | 3.83  | 496                | 1.15 | 1-Ethyl-3-methylimidazolium 4-methylbenzenesulfonate                                                |                                                                                                 |



|            |                                    |       |       |       |       |       |       |       |       |       |                    |     |      |                                                                                                              |
|------------|------------------------------------|-------|-------|-------|-------|-------|-------|-------|-------|-------|--------------------|-----|------|--------------------------------------------------------------------------------------------------------------|
| <b>101</b> | IM12 8OSO3                         | 3.24  | -6.75 | 0.93  | 1.70  | -1.60 | -1.48 | -1.82 | 3.86  | 4.62  |                    | 553 | 1.30 | 1-Ethyl-3-methylimidazolium octylsulfate                                                                     |
| <b>102</b> | IM12 BF4                           | 3.24  | -6.75 | 0.93  | 1.70  | -1.60 | 1.67  | -0.06 | -0.33 | -3.83 | 308.1 <sup>a</sup> | 324 | 0.60 | 1-Ethyl-3-methylimidazolium tetrafluoroborate                                                                |
| <b>103</b> | IM12 CF3COO                        | 3.24  | -6.75 | 0.93  | 1.70  | -1.60 | 3.18  | 2.08  | -2.30 | -0.22 | 316.5 <sup>b</sup> | 354 | 0.74 | 1-Ethyl-3-methylimidazolium trifluoroacetate                                                                 |
| <b>104</b> | IM12 CF3SO3                        | 3.24  | -6.75 | 0.93  | 1.70  | -1.60 | 1.41  | -0.86 | 0.07  | -2.60 | 363 <sup>a</sup>   | 344 | 0.47 | 1-Ethyl-3-methylimidazolium trifluoromethanesulfonate                                                        |
| <b>105</b> | IM12 HSO4                          | 3.24  | -6.75 | 0.93  | 1.70  | -1.60 | 2.60  | 1.36  | -1.42 | -2.11 | 295.5 <sup>b</sup> | 341 | 0.55 | 1-Ethyl-3-methylimidazolium hydrogen sulfate                                                                 |
| <b>106</b> | IM12 PF6                           | 3.24  | -6.75 | 0.93  | 1.70  | -1.60 | 1.13  | -1.14 | -0.21 | -3.53 |                    | 313 | 0.54 | 1-Ethyl-3-methylimidazolium hexafluorophosphate                                                              |
| <b>107</b> | IM12 SCN                           | 3.24  | -6.75 | 0.93  | 1.70  | -1.60 | 0.65  | -2.07 | -3.10 | 1.46  | 281.4 <sup>b</sup> | 274 | 0.67 | 1-Ethyl-3-methylimidazolium thiocyanate                                                                      |
| <b>108</b> | IM12 Br                            | 3.24  | -6.75 | 0.93  | 1.70  | -1.60 | -0.52 | -5.52 | -2.16 | -1.13 | 207.5 <sup>b</sup> | 208 | 0.71 | 1-Ethyl-3-methylimidazolium bromide                                                                          |
| <b>109</b> | IM12 NO3                           | 3.24  | -6.75 | 0.93  | 1.70  | -1.60 | -6.94 | -0.46 | -2.37 | -1.73 |                    | 221 | 1.56 | 1-Ethyl-3-methylimidazolium nitrate                                                                          |
| <b>110</b> | [C2MIM][FeCl4] 1.51                | 3.24  | -6.75 | 0.93  | 1.70  | -1.60 | -4.01 | -4.57 | -0.46 | 0.67  |                    | 284 | 1.08 | 1-ethyl-3-methylimidazolium tetrachloroferrate                                                               |
| <b>111</b> | IM11CN Cl                          | 5.65  | -3.19 | 5.25  | -4.99 | -2.61 | -0.57 | -5.73 | -2.31 | -1.25 |                    | 5   | 2.05 | 1-(Cyanomethyl)-3-methylimidazolium chloride                                                                 |
| <b>112</b> | IM11CN (CF3SO2)2N                  | 5.65  | -3.19 | 5.25  | -4.99 | -2.61 | -1.19 | -2.15 | 2.86  | 2.10  |                    | 284 | 2.45 | 1-(Cyanomethyl)-3-methylimidazolium 1,1,1-trifluoro-N-[(trifluoromethyl)sulfonyl]methanesulfonamide          |
| <b>113</b> | IM11CONMeBu Br                     | 2.43  | 1.73  | 1.93  | 0.17  | -1.17 | -0.52 | -5.52 | -2.16 | -1.13 |                    | 190 | 1.79 | 1-[2-(Butylmethylamino)-2-oxoethyl]-3-methylimidazolium bromide                                              |
| <b>114</b> | IM11CONEt2 Br                      | 3.60  | 1.16  | 2.52  | -0.30 | -1.47 | -0.52 | -5.52 | -2.16 | -1.13 |                    | 149 | 1.75 | 1-[2-(Diethylamino)-2-oxoethyl]-3-methylimidazolium bromide                                                  |
| <b>115</b> | IM11CONHBu Br                      | 2.91  | 2.71  | 3.36  | -1.67 | -1.72 | -0.52 | -5.52 | -2.16 | -1.13 |                    | 133 | 2.26 | 1-[2-(Butylamino)-2-oxoethyl]-3-methylimidazolium bromide                                                    |
| <b>116</b> | IM11COO1 Br                        | 7.61  | 2.40  | 0.08  | 1.03  | -2.04 | -0.52 | -5.52 | -2.16 | -1.13 |                    | 58  | 2.17 | 1-(2-Methoxy-2-oxoethyl)-3-methylimidazolium bromide                                                         |
| <b>117</b> | IM11COO1(COO4)(Ph-(3,4-OCH2O-)) Br | -1.26 | 12.75 | 4.21  | 0.45  | -9.43 | -0.52 | -5.52 | -2.16 | -1.13 |                    | -12 | 6.63 | 1-[2-[1-(1,3-Benzodioxol-5-yl)-2-butoxy-2-oxoethoxy]-2-oxoethyl]-3-methylimidazolium bromide                 |
| <b>118</b> | IM11COO2 BF4                       | 6.71  | 2.81  | -0.50 | 1.76  | -1.59 | 1.67  | -0.06 | -0.33 | -3.83 |                    | 219 | 2.68 | 1-(2-Ethoxy-2-oxoethyl)-3-methylimidazolium tetrafluoroborate                                                |
| <b>119</b> | IM11COO2 Br                        | 6.71  | 2.81  | -0.50 | 1.76  | -1.59 | -0.52 | -5.52 | -2.16 | -1.13 |                    | 102 | 2.19 | 1-(2-Ethoxy-2-oxoethyl)-3-methylimidazolium bromide                                                          |
| <b>120</b> | IM11COO3 (CF3SO2)2N                | 4.93  | 1.96  | -0.19 | 1.96  | -2.50 | -1.19 | -2.15 | 2.86  | 2.10  |                    | 389 | 2.40 | 1-Methyl-3-(2-oxo-2-propoxyethyl)imidazolium 1,1,1-trifluoro-N-[(trifluoromethyl)sulfonyl]methanesulfonamide |
| <b>121</b> | IM11COO3 8OSO3                     | 4.93  | 1.96  | -0.19 | 1.96  | -2.50 | -1.48 | -1.82 | 3.86  | 4.62  |                    | 466 | 2.52 | 1-Methyl-3-(2-oxo-2-propoxyethyl)imidazolium octylsulfate                                                    |
| <b>122</b> | IM11COO3 BF4                       | 4.93  | 1.96  | -0.19 | 1.96  | -2.50 | 1.67  | -0.06 | -0.33 | -3.83 |                    | 237 | 2.58 | 1-Methyl-3-(2-oxo-2-propoxyethyl)imidazolium tetrafluoroborate                                               |
| <b>123</b> | IM11COO3 Br                        | 4.93  | 1.96  | -0.19 | 1.96  | -2.50 | -0.52 | -5.52 | -2.16 | -1.13 |                    | 120 | 2.20 | 1-Methyl-3-(2-oxo-2-propoxyethyl)imidazolium bromide                                                         |
| <b>124</b> | IM11COO3 N(CN)2                    | 4.93  | 1.96  | -0.19 | 1.96  | -2.50 | -2.48 | 0.49  | 0.00  | 0.73  |                    | 299 | 2.41 | 1-Methyl-3-(2-oxo-2-propoxyethyl)imidazolium N-cyanocyanamide                                                |
| <b>125</b> | IM11COO3 PF6                       | 4.93  | 1.96  | -0.19 | 1.96  | -2.50 | 1.13  | -1.14 | -0.21 | -3.53 |                    | 226 | 2.49 | 1-Methyl-3-(2-oxo-2-propoxyethyl)imidazolium hexafluorophosphate                                             |
| <b>126</b> | IM11COO4 (CF3SO2)2N                | 4.15  | 3.03  | -0.57 | 1.95  | -1.69 | -1.19 | -2.15 | 2.86  | 2.10  |                    | 429 | 2.39 | 3-(2-Butoxy-2-oxoethyl)-1-methylimidazolium N-[(trifluoromethyl)sulfonyl]methanesulfonamide                  |

|            |                   |       |       |       |       |       |       |       |       |       |                  |      |                                                                                                        |                                                                                              |
|------------|-------------------|-------|-------|-------|-------|-------|-------|-------|-------|-------|------------------|------|--------------------------------------------------------------------------------------------------------|----------------------------------------------------------------------------------------------|
| <b>127</b> | IM11COO4 8OSO3    | 4.15  | 3.03  | -0.57 | 1.95  | -1.69 | -1.48 | -1.82 | 3.86  | 4.62  | 506              | 2.48 | 1-(2-Butoxy-2-oxoethyl)-3-methylimidazolium octylsulfate                                               |                                                                                              |
| <b>128</b> | IM11COO4 BF4      | 4.15  | 3.03  | -0.57 | 1.95  | -1.69 | 1.67  | -0.06 | -0.33 | -3.83 | 277              | 2.69 | 1-(2-Butoxy-2-oxoethyl)-3-methylimidazolium tetrafluoroborate                                          |                                                                                              |
| <b>129</b> | IM11COO4 Br       | 4.15  | 3.03  | -0.57 | 1.95  | -1.69 | -0.52 | -5.52 | -2.16 | -1.13 | 160              | 2.24 | 1-(2-Butoxy-2-oxoethyl)-3-methylimidazolium bromide                                                    |                                                                                              |
| <b>130</b> | IM11COO4 N(CN)2   | 4.15  | 3.03  | -0.57 | 1.95  | -1.69 | -2.48 | 0.49  | 0.00  | 0.73  | 338              | 2.44 | 1-(2-Butoxy-2-oxoethyl)-3-methylimidazolium N-cyanocyanamide                                           |                                                                                              |
| <b>131</b> | IM11COO4 PF6      | 4.15  | 3.03  | -0.57 | 1.95  | -1.69 | 1.13  | -1.14 | -0.21 | -3.53 | 266              | 2.59 | 1-(2-Butoxy-2-oxoethyl)-3-methylimidazolium hexafluorophosphate                                        |                                                                                              |
| <b>132</b> | IM11COO5 8OSO3    | 2.15  | 2.70  | -0.08 | 2.28  | -2.61 | -1.48 | -1.82 | 3.86  | 4.62  | 528              | 2.61 | 1-Methyl-3-[2-oxo-2-(pentyloxy)ethyl]imidazolium octylsulfate                                          |                                                                                              |
| <b>133</b> | IM11COO5 Br       | 2.15  | 2.70  | -0.08 | 2.28  | -2.61 | -0.52 | -5.52 | -2.16 | -1.13 | 182              | 2.40 | 1-Methyl-3-[2-oxo-2-(pentyloxy)ethyl]imidazolium bromide                                               |                                                                                              |
| <b>134</b> | IM11COO6 Br       | 1.62  | 2.95  | -0.77 | 2.59  | -2.31 | -0.52 | -5.52 | -2.16 | -1.13 | 209              | 2.42 | 1-[2-(Hexyloxy)-2-oxoethyl]-3-methylimidazolium bromide                                                |                                                                                              |
| <b>135</b> | IM11COO8 Br       | -1.30 | 2.89  | 0.41  | 1.89  | -1.69 | -0.52 | -5.52 | -2.16 | -1.13 | 283              | 2.25 | 1-Methyl-3-[2-(octyloxy)-2-oxoethyl]imidazolium bromide                                                |                                                                                              |
| <b>136</b> | IM1i4 (CF3SO2)2N  | 1.42  | -5.98 | 0.77  | 1.78  | -0.34 | -1.19 | -2.15 | 2.86  | 2.10  | 556              | 0.58 | 1-Methyl-3-(2-methylpropyl)imidazolium 1,1,1-trifluoro-N-[(trifluoromethyl)sulfonyl]methanesulfonamide |                                                                                              |
| <b>137</b> | IM1gly Cl         | 12.59 | 9.92  | 2.10  | -6.03 | 2.96  | -0.57 | -5.73 | -2.31 | -1.25 | -34              | 3.88 | 1-methyl-3-glycerylymidazolium chloride                                                                |                                                                                              |
| <b>138</b> | IM1gly N(CN)2     | 12.59 | 9.92  | 2.10  | -6.03 | 2.96  | -2.48 | 0.49  | 0.00  | 0.73  | 155              | 4.17 | 1-methyl-3-glycerylimidazolium dicyanamide                                                             |                                                                                              |
| <b>139</b> | IM1gly (CF3SO2)2N | 12.59 | 9.92  | 2.10  | -6.03 | 2.96  | -1.19 | -2.15 | 2.86  | 2.10  | 245              | 4.12 | 1-methyl-3-glycerylimidazolium 1,1,1-trifluoro-N-[(trifluoromethyl)sulfonyl]methanesulfonamide         |                                                                                              |
| <b>140</b> | IM1-2=1 Cl        | 1.49  | -6.89 | 2.60  | 0.50  | -0.78 | -0.57 | -5.73 | -2.31 | -1.25 | 243              | 0.73 | 1-Methyl-3-(2-propenyl)imidazolium chloride                                                            |                                                                                              |
| <b>141</b> | IM1-(1Ph-4Me) BF4 | -1.72 | -6.38 | 3.34  | -0.01 | -1.50 | 1.67  | -0.06 | -0.33 | -3.83 | 413              | 0.90 | 1-Methyl-3-(phenylmethyl)imidazolium tetrafluoroborate                                                 |                                                                                              |
| <b>142</b> | IM1-(1Ph-4Me) Cl  | -1.72 | -6.38 | 3.34  | -0.01 | -1.50 | -0.57 | -5.73 | -2.31 | -1.25 | 286              | 1.07 | 1-Methyl-3-[(4-methylphenyl)methyl]imidazolium chloride                                                |                                                                                              |
| <b>143</b> | IM1-(1Ph-4Me) PF6 | -1.72 | -6.38 | 3.34  | -0.01 | -1.50 | 1.13  | -1.14 | -0.21 | -3.53 | 402              | 0.88 | 1-Methyl-3-[(4-methylphenyl)methyl]imidazolium hexafluorophosphate                                     |                                                                                              |
| <b>144</b> | IM1-1Ph BF4       | -0.98 | -6.53 | 3.48  | -0.20 | -1.45 | 1.67  | -0.06 | -0.33 | -3.83 | 395              | 0.88 | 1-Methyl-3-(phenylmethyl)imidazolium tetrafluoroborate                                                 |                                                                                              |
| <b>145</b> | IM1-3Ph Cl        | -0.98 | -6.53 | 3.48  | -0.20 | -1.45 | -0.57 | -5.73 | -2.31 | -1.25 | 268              | 1.03 | 1-Methyl-3-(phenylmethyl)imidazolium chloride                                                          |                                                                                              |
| <b>146</b> | IM1-1Ph PF6       | -0.98 | -6.53 | 3.48  | -0.20 | -1.45 | 1.13  | -1.14 | -0.21 | -3.53 | 384              | 0.86 | 1-Methyl-3-(phenylmethyl)imidazolium hexafluorophosphate                                               |                                                                                              |
| <b>147</b> | IM13 BF4          | 1.85  | -6.45 | 1.37  | 1.24  | -0.80 | 1.67  | -0.06 | -0.33 | -3.83 | 373              | 0.60 | 1-Methyl-3-propylimidazolium tetrafluoroborate                                                         |                                                                                              |
| <b>148</b> | IM13 (CF3SO2)2N   | 1.85  | -6.45 | 1.37  | 1.24  | -0.80 | -1.19 | -2.15 | 2.86  | 2.10  | 535 <sup>b</sup> | 525  | 0.73                                                                                                   | 1-Methyl-3-propylimidazolium 1,1,1-trifluoro-N-[(trifluoromethyl)sulfonyl]methanesulfonamide |
| <b>149</b> | IM13 PF6          | 1.85  | -6.45 | 1.37  | 1.24  | -0.80 | 1.13  | -1.14 | -0.21 | -3.53 | 362              | 0.51 | 1-Methyl-3-propylimidazolium hexafluorophosphate                                                       |                                                                                              |
| <b>150</b> | IM13 Br           | 1.85  | -6.45 | 1.37  | 1.24  | -0.80 | -0.52 | -5.52 | -2.16 | -1.13 | 281 <sup>b</sup> | 256  | 0.58                                                                                                   | 1-Methyl-3-propylimidazolium bromide                                                         |
| <b>151</b> | IM13 Cl           | 1.85  | -6.45 | 1.37  | 1.24  | -0.80 | -0.57 | -5.73 | -2.31 | -1.25 | 246              | 0.59 | 1-Methyl-3-propylimidazolium chloride                                                                  |                                                                                              |
| <b>152</b> | IM13 I            | 1.85  | -6.45 | 1.37  | 1.24  | -0.80 | -0.65 | -5.31 | -1.63 | -1.12 | 277              | 0.55 | 1-Methyl-3-propylimidazolium iodide                                                                    |                                                                                              |

|            |                   |       |       |       |       |       |       |       |       |       |                    |      |                                                                                            |                                                                                             |
|------------|-------------------|-------|-------|-------|-------|-------|-------|-------|-------|-------|--------------------|------|--------------------------------------------------------------------------------------------|---------------------------------------------------------------------------------------------|
| <b>153</b> | IM1-2CO-1 Br      | 5.91  | 1.45  | 2.73  | -1.85 | 0.18  | -0.52 | -5.52 | -2.16 | -1.13 | 124                | 1.71 | 1-Methyl-3-(3-oxobutyl)imidazolium bromide                                                 |                                                                                             |
| <b>154</b> | IM1-2C6F13 PF6    | 1.89  | 7.73  | -2.78 | 3.01  | 0.18  | 1.13  | -1.14 | -0.21 | -3.53 | 379                | 3.54 | 1-Methyl-3-(3,3,4,4,5,5,6,6,7,7,8,8,8-tridecafluorooctyl)imidazolium hexafluorophosphate   |                                                                                             |
| <b>155</b> | IM12(2Pin-1R) Cl  | -3.71 | -4.44 | 1.54  | 1.20  | 1.21  | -0.57 | -5.73 | -2.31 | -1.25 | 427                | 1.05 | 1-[2-[(1R,5S)-6,6-Dimethylbicyclo[3.1.1]hept-2-en-2-yl]ethyl]-3-methylimidazolium chloride |                                                                                             |
| <b>156</b> | IM12(2Pin-1R) NO3 | -3.71 | -4.44 | 1.54  | 1.20  | 1.21  | -6.94 | -0.46 | -2.37 | -1.73 | 451                | 1.48 | 1-[2-[(1R,5S)-6,6-Dimethylbicyclo[3.1.1]hept-2-en-2-yl]ethyl]-3-methylimidazolium nitrate  |                                                                                             |
| <b>157</b> | IM1-2Ph BF4       | -3.43 | -6.10 | 4.96  | -1.28 | 0.61  | 1.67  | -0.06 | -0.33 | -3.83 | 494                | 1.59 | 1-Methyl-3-(2-phenylethyl)imidazolium tetrafluoroborate                                    |                                                                                             |
| <b>158</b> | IM1-2Ph Cl        | -3.43 | -6.10 | 4.96  | -1.28 | 0.61  | -0.57 | -5.73 | -2.31 | -1.25 | 367                | 1.55 | 1-Methyl-3-(2-phenylethyl)imidazolium chloride                                             |                                                                                             |
| <b>159</b> | IM1-2Ph PF6       | -3.43 | -6.10 | 4.96  | -1.28 | 0.61  | 1.13  | -1.14 | -0.21 | -3.53 | 483                | 1.54 | 1-Methyl-3-(2-phenylethyl)imidazolium hexafluorophosphate                                  |                                                                                             |
| <b>160</b> | IM14 8OSO3        | 0.58  | -5.91 | 1.21  | 1.20  | -0.39 | -1.48 | -1.82 | 3.86  | 4.62  | 635 <sup>a</sup>   | 642  | 0.90                                                                                       | 1-Butyl-3-methylimidazolium octylsulfate                                                    |
| <b>161</b> | IM14 CF3SO3       | 0.58  | -5.91 | 1.21  | 1.20  | -0.39 | 1.41  | -0.86 | 0.07  | -2.60 | 427.7 <sup>a</sup> | 432  | 0.50                                                                                       | 1-Butyl-3-methylimidazolium trifluoromethanesulfonate                                       |
| <b>162</b> | IM14 (CF3)2N      | 0.58  | -5.91 | 1.21  | 1.20  | -0.39 | 1.11  | -1.38 | -0.04 | -2.50 | 420                | 0.45 | 1-Butyl-3-methylimidazolium 1,1,1-trifluoro-N-(trifluoromethyl)methanaminat                |                                                                                             |
| <b>163</b> | IM14 BF4          | 0.58  | -5.91 | 1.21  | 1.20  | -0.39 | 1.67  | -0.06 | -0.33 | -3.83 | 367.1 <sup>a</sup> | 413  | 0.73                                                                                       | 1-Butyl-3-methylimidazolium tetrafluoroborate                                               |
| <b>164</b> | IM14 (CF3SO2)2N   | 0.58  | -5.91 | 1.21  | 1.20  | -0.39 | -1.19 | -2.15 | 2.86  | 2.10  | 565.1 <sup>a</sup> | 565  | 0.54                                                                                       | 1-Butyl-3-methylimidazolium 1,1,1-trifluoro-N-[(trifluoromethyl)sulfonyl]methanesulfonamide |
| <b>165</b> | IM14 PF6          | 0.58  | -5.91 | 1.21  | 1.20  | -0.39 | 1.13  | -1.14 | -0.21 | -3.53 | 408.7 <sup>a</sup> | 402  | 0.63                                                                                       | 1-Butyl-3-methylimidazolium hexafluorophosphate                                             |
| <b>166</b> | IM14 Cl           | 0.58  | -5.91 | 1.21  | 1.20  | -0.39 | -0.57 | -5.73 | -2.31 | -1.25 | 317 <sup>a</sup>   | 286  | 0.62                                                                                       | 1-Butyl-3-methylimidazolium chloride                                                        |
| <b>167</b> | IM14 I            | 0.58  | -5.91 | 1.21  | 1.20  | -0.39 | -0.65 | -5.31 | -1.63 | -1.12 | 314 <sup>a</sup>   | 317  | 0.55                                                                                       | 1-Butyl-3-methylimidazolium iodide                                                          |
| <b>168</b> | IM14 Br           | 0.58  | -5.91 | 1.21  | 1.20  | -0.39 | -0.52 | -5.52 | -2.16 | -1.13 | 311.4 <sup>a</sup> | 296  | 0.58                                                                                       | 1-Butyl-3-methylimidazolium bromide                                                         |
| <b>169</b> | IM14 N(CN)2       | 0.58  | -5.91 | 1.21  | 1.20  | -0.39 | -2.48 | 0.49  | 0.00  | 0.73  | 375.7 <sup>a</sup> | 475  | 0.67                                                                                       | 1-Butyl-3-methylimidazolium N-cyanocyanamide                                                |
| <b>170</b> | IM14 4MePhSO3     | 0.58  | -5.91 | 1.21  | 1.20  | -0.39 | -1.66 | -1.59 | 2.48  | 3.83  | 412.7 <sup>b</sup> | 584  | 0.75                                                                                       | 1-Butyl-3-methylimidazolium 4-methylbenzenesulfonate                                        |
| <b>171</b> | IM14 1SO3         | 0.58  | -5.91 | 1.21  | 1.20  | -0.39 | 1.32  | -1.45 | -0.86 | -1.35 | 410                | 0.33 | 1-Butyl-3-methylimidazolium methanesulfonate                                               |                                                                                             |
| <b>172</b> | IM14 (2-SO2PhCO)N | 0.58  | -5.91 | 1.21  | 1.20  | -0.39 | -0.91 | -0.17 | 1.38  | 3.13  | 561                | 0.60 | 1-Butyl-3-methylimidazolium, salt with 1,2-benzisothiazol-3(2H)-one 1,1-dioxide            |                                                                                             |
| <b>173</b> | IM14 (C2F5)3PF3   | 0.58  | -5.91 | 1.21  | 1.20  | -0.39 | 2.83  | 3.03  | 4.77  | -1.46 | 680                | 0.84 | 1-Butyl-3-methylimidazolium trifluorotris(pentafluoroethyl)phosphate                       |                                                                                             |
| <b>174</b> | IM14 1O2O2OSO3    | 0.58  | -5.91 | 1.21  | 1.20  | -0.39 | 1.54  | 0.57  | 3.67  | 1.93  | 643 <sup>a</sup>   | 649  | 0.52                                                                                       | 1-Butyl-3-methylimidazolium 2-(2-methoxyethoxy)ethyl sulfate                                |
| <b>175</b> | IM14 1OSO3        | 0.58  | -5.91 | 1.21  | 1.20  | -0.39 | 1.36  | -1.16 | -0.44 | -1.31 | 416 <sup>a</sup>   | 430  | 0.33                                                                                       | 1-Butyl-3-methylimidazolium methyl sulfate                                                  |
| <b>176</b> | IM14 AC           | 0.58  | -5.91 | 1.21  | 1.20  | -0.39 | 0.38  | -0.22 | 0.92  | 2.67  | 546                | 0.49 | 3-Butyl-1-methylimidazolium 6-methyl-2,2-dioxo-1,2,3-oxathiazin-4(3H)-onate                |                                                                                             |
| <b>177</b> | IM14 Co(CO)4      | 0.58  | -5.91 | 1.21  | 1.20  | -0.39 | -0.43 | -2.12 | -1.00 | 3.57  | 460                | 0.69 | 1-Butyl-3-methylimidazolium (T-4)-tetracarbonylcobaltate                                   |                                                                                             |
| <b>178</b> | IM14 FeCl4        | 0.58  | -5.91 | 1.21  | 1.20  | -0.39 | -4.01 | -4.57 | -0.46 | 0.67  | 415 <sup>a</sup>   | 373  | 0.76                                                                                       | 1-Butyl-3-methylimidazolium tetrachloroferrate                                              |

|            |                   |       |       |      |       |       |        |       |       |       |                    |     |      |                                                                                              |
|------------|-------------------|-------|-------|------|-------|-------|--------|-------|-------|-------|--------------------|-----|------|----------------------------------------------------------------------------------------------|
| <b>179</b> | IM14 HSO4         | 0.58  | -5.91 | 1.21 | 1.20  | -0.39 | 2.60   | 1.36  | -1.42 | -2.11 |                    | 429 | 0.72 | 1-Butyl-3-methylimidazolium hydrogen sulfate                                                 |
| <b>180</b> | IM14 NO3          | 0.58  | -5.91 | 1.21 | 1.20  | -0.39 | -6.94  | -0.46 | -2.37 | -1.73 | 353.5 <sup>a</sup> | 309 | 1.43 | 1-Butyl-3-methylimidazolium nitrate                                                          |
| <b>181</b> | IM14 SbF6         | 0.58  | -5.91 | 1.21 | 1.20  | -0.39 | 1.35   | -0.70 | -0.12 | -3.68 |                    | 411 | 0.66 | 1-Butyl-3-methylimidazolium (OC-6-11)-hexafluoroantimonate                                   |
| <b>182</b> | IM14 SCN          | 0.58  | -5.91 | 1.21 | 1.20  | -0.39 | 0.65   | -2.07 | -3.10 | 1.46  | 385 <sup>b</sup>   | 363 | 0.59 | 1-Butyl-3-methylimidazolium thiocyanate                                                      |
| <b>183</b> | IM14 (10)2PO2     | 0.58  | -5.91 | 1.21 | 1.20  | -0.39 | 1.30   | -1.22 | 0.20  | -0.78 |                    | 459 | 0.26 | 1-butyl-3-methylimidazolium dimethyl phosphate                                               |
| <b>184</b> | IM14 C(CN)3       | 0.58  | -5.91 | 1.21 | 1.20  | -0.39 | -13.16 | 6.89  | -1.96 | -0.13 |                    | 413 | 3.15 | 1-butyl-3-methylimidazolium tricyanomethanide                                                |
| <b>185</b> | IM14 CF3COO       | 0.58  | -5.91 | 1.21 | 1.20  | -0.39 | 3.18   | 2.08  | -2.30 | -0.22 | 408.2 <sup>a</sup> | 443 | 0.89 | 1-Butyl-3-Methylimidazolium trifluoroacetate                                                 |
| <b>186</b> | IM13COOH Cl       | 10.77 | 5.41  | 3.56 | -2.44 | 0.51  | -0.57  | -5.73 | -2.31 | -1.25 |                    | -12 | 2.74 | 3-(3-Carboxypropyl)-1-methylimidazolium chloride                                             |
| <b>187</b> | IM15 (CF3SO2)2N   | -0.64 | -5.56 | 1.33 | 1.08  | 0.30  | -1.19  | -2.15 | 2.86  | 2.10  | 596 <sup>b</sup>   | 611 | 0.39 | 1-Methyl-3-pentylimidazolium 1,1,1-trifluoro-N-[(trifluoromethyl)sulfonyl]methanesulfonamide |
| <b>188</b> | IM15 BF4          | -0.64 | -5.56 | 1.33 | 1.08  | 0.30  | 1.67   | -0.06 | -0.33 | -3.83 |                    | 459 | 0.91 | 1-Methyl-3-pentylimidazolium tetrafluoroborate                                               |
| <b>189</b> | IM15 Cl           | -0.64 | -5.56 | 1.33 | 1.08  | 0.30  | -0.57  | -5.73 | -2.31 | -1.25 |                    | 332 | 0.72 | 1-Methyl-3-pentylimidazolium chloride                                                        |
| <b>190</b> | IM15 PF6          | -0.64 | -5.56 | 1.33 | 1.08  | 0.30  | 1.13   | -1.14 | -0.21 | -3.53 |                    | 448 | 0.80 | 1-Methyl-3-pentylimidazolium hexafluorophosphate                                             |
| <b>191</b> | IM16 (CF3SO2)2N   | -1.54 | -5.78 | 1.66 | 0.51  | -0.75 | -1.19  | -2.15 | 2.86  | 2.10  | 631.6 <sup>a</sup> | 593 | 0.64 | 1-Hexyl-3-methylimidazolium 1,1,1-trifluoro-N-[(trifluoromethyl)sulfonyl]methanesulfonamide  |
| <b>192</b> | IM16 Br           | -1.54 | -5.78 | 1.66 | 0.51  | -0.75 | -0.52  | -5.52 | -2.16 | -1.13 | 344 <sup>a</sup>   | 324 | 0.77 | 1-Hexyl-3-methylimidazolium bromide                                                          |
| <b>193</b> | IM16 Cl           | -1.54 | -5.78 | 1.66 | 0.51  | -0.75 | -0.57  | -5.73 | -2.31 | -1.25 | 381 <sup>b</sup>   | 314 | 0.80 | 1-Hexyl-3-methylimidazolium chloride                                                         |
| <b>194</b> | IM16 PF6          | -1.54 | -5.78 | 1.66 | 0.51  | -0.75 | 1.13   | -1.14 | -0.21 | -3.53 | 424 <sup>b</sup>   | 430 | 0.73 | 1-Hexyl-3-methylimidazolium hexafluorophosphate                                              |
| <b>195</b> | IM16 (2-SO2PhCO)N | -1.54 | -5.78 | 1.66 | 0.51  | -0.75 | -0.91  | -0.17 | 1.38  | 3.13  |                    | 589 | 0.67 | 1-Hexyl-3-methylimidazolium, salt with 1,2-benzisothiazol-3(2H)-one 1,1-dioxide              |
| <b>196</b> | IM16 BF4          | -1.54 | -5.78 | 1.66 | 0.51  | -0.75 | 1.67   | -0.06 | -0.33 | -3.83 | 429.8 <sup>a</sup> | 441 | 0.80 | 1-Hexyl-3-methylimidazolium tetrafluoroborate                                                |
| <b>197</b> | IM16 (C2F5)3PF3   | -1.54 | -5.78 | 1.66 | 0.51  | -0.75 | 2.83   | 3.03  | 4.77  | -1.46 | 730 <sup>b</sup>   | 708 | 0.83 | 1-Hexyl-3-methylimidazolium trifluorotris(pentafluoroethyl)phosphate                         |
| <b>198</b> | IM16 (C3F7)3PF3   | -1.54 | -5.78 | 1.66 | 0.51  | -0.75 | 4.00   | 5.68  | 6.72  | -0.31 |                    | 840 | 1.08 | 1-Hexyl-3-methylimidazolium trifluorotris(heptafluoropropyl)phosphate                        |
| <b>199</b> | IM16 (CF3SO2)3C   | -1.54 | -5.78 | 1.66 | 0.51  | -0.75 | -0.58  | -1.39 | 3.93  | 0.50  |                    | 621 | 0.57 | 1-Hexyl-3-methylimidazolium tris[(trifluoromethyl)sulfonyl]methide                           |
| <b>200</b> | IM16 N(CN)2       | -1.54 | -5.78 | 1.66 | 0.51  | -0.75 | -2.48  | 0.49  | 0.00  | 0.73  | 534 <sup>b</sup>   | 503 | 0.77 | 1-hexyl-3-methylimidazolium dicyanamide                                                      |
| <b>201</b> | IM16 NO           | -1.54 | -5.78 | 1.66 | 0.51  | -0.75 | -6.94  | -0.46 | -2.37 | -1.73 |                    | 337 | 1.49 | 1-hexyl-3-methylimidazolium nitrate                                                          |
| <b>202</b> | IM16 SbF6         | -1.54 | -5.78 | 1.66 | 0.51  | -0.75 | 1.35   | -0.70 | -0.12 | -3.68 |                    | 439 | 0.74 | 1-hexyl-3-methylimidazolium hexafluoroantimonate                                             |
| <b>203</b> | IM17 (CF3SO2)2N   | -2.66 | -4.82 | 0.99 | 1.12  | 0.77  | -1.19  | -2.15 | 2.86  | 2.10  |                    | 671 | 0.24 | 1-Heptyl-3-methylimidazolium 1,1,1-trifluoro-N-[(trifluoromethyl)sulfonyl]methanesulfonamide |
| <b>204</b> | IM17 BF4          | -2.66 | -4.82 | 0.99 | 1.12  | 0.77  | 1.67   | -0.06 | -0.33 | -3.83 |                    | 519 | 1.12 | 1-Heptyl-3-methylimidazolium tetrafluoroborate                                               |

|            |                   |        |       |      |       |      |       |       |       |       |                    |     |      |                                                                                             |
|------------|-------------------|--------|-------|------|-------|------|-------|-------|-------|-------|--------------------|-----|------|---------------------------------------------------------------------------------------------|
| <b>205</b> | IM17 Cl           | -2.66  | -4.82 | 0.99 | 1.12  | 0.77 | -0.57 | -5.73 | -2.31 | -1.25 |                    | 392 | 0.89 | 1-Heptyl-3-methylimidazolium chloride                                                       |
| <b>206</b> | IM17 PF6          | -2.66  | -4.82 | 0.99 | 1.12  | 0.77 | 1.13  | -1.14 | -0.21 | -3.53 |                    | 508 | 1.01 | 1-Heptyl-3-methylimidazolium hexafluorophosphate                                            |
| <b>207</b> | IM18 BF4          | -3.07  | -4.67 | 0.46 | 1.44  | 0.28 | 1.67  | -0.06 | -0.33 | -3.83 | 497.8 <sup>a</sup> | 519 | 1.09 | 1-Methyl-3-octylimidazolium tetrafluoroborate                                               |
| <b>208</b> | IM18 Br           | -3.07  | -4.67 | 0.46 | 1.44  | 0.28 | -0.52 | -5.52 | -2.16 | -1.13 | 392 <sup>a</sup>   | 402 | 0.88 | 1-Methyl-3-octylimidazolium bromide                                                         |
| <b>209</b> | IM18 (CF3SO2)2N   | -3.07  | -4.67 | 0.46 | 1.44  | 0.28 | -1.19 | -2.15 | 2.86  | 2.10  | 692.7 <sup>a</sup> | 671 | 0.23 | 1-Methyl-3-octylimidazolium 1,1,1-trifluoro-N-[(trifluoromethyl)sulfonyl]methanesulfonamide |
| <b>210</b> | IM18 8OSO3        | -3.07  | -4.67 | 0.46 | 1.44  | 0.28 | -1.48 | -1.82 | 3.86  | 4.62  |                    | 748 | 0.53 | 3-Methyl-1-octylimidazolium octylsulfate                                                    |
| <b>211</b> | IM18 CF3SO3       | -3.07  | -4.67 | 0.46 | 1.44  | 0.28 | 1.41  | -0.86 | 0.07  | -2.60 |                    | 538 | 0.86 | 1-Methyl-3-octylimidazolium trifluoromethanesulfonate                                       |
| <b>212</b> | IM18 Cl           | -3.07  | -4.67 | 0.46 | 1.44  | 0.28 | -0.57 | -5.73 | -2.31 | -1.25 |                    | 392 | 0.89 | 1-Methyl-3-octylimidazolium chloride                                                        |
| <b>213</b> | IM18 PF6          | -3.07  | -4.67 | 0.46 | 1.44  | 0.28 | 1.13  | -1.14 | -0.21 | -3.53 | 851 <sup>a</sup>   | 508 | 0.97 | 1-Methyl-3-octylimidazolium hexafluorophosphate                                             |
| <b>214</b> | IM17COOH Br       | 6.03   | 5.48  | 3.42 | -1.70 | 1.31 | -0.52 | -5.52 | -2.16 | -1.13 |                    | 141 | 2.55 | 1-(7-Carboxyheptyl)-3-methylimidazolium bromide                                             |
| <b>215</b> | IM19 BF4          | -4.95  | -4.26 | 1.20 | 0.99  | 1.25 | 1.67  | -0.06 | -0.33 | -3.83 |                    | 582 | 1.36 | 1-Methyl-3-nonylimidazolium tetrafluoroborate                                               |
| <b>216</b> | IM19 Cl           | -4.95  | -4.26 | 1.20 | 0.99  | 1.25 | -0.57 | -5.73 | -2.31 | -1.25 |                    | 455 | 1.15 | 1-Methyl-3-nonylimidazolium chloride                                                        |
| <b>217</b> | IM19 PF6          | -4.95  | -4.26 | 1.20 | 0.99  | 1.25 | 1.13  | -1.14 | -0.21 | -3.53 |                    | 571 | 1.26 | 1-Methyl-3-nonylimidazolium hexafluorophosphate                                             |
| <b>218</b> | IM1-10 BF4        | -5.83  | -4.13 | 1.06 | 0.96  | 1.33 | 1.67  | -0.06 | -0.33 | -3.83 |                    | 605 | 1.43 | 1-Decyl-3-methylimidazolium tetrafluoroborate                                               |
| <b>219</b> | IM1-10 Br         | -5.83  | -4.13 | 1.06 | 0.96  | 1.33 | -0.52 | -5.52 | -2.16 | -1.13 |                    | 488 | 1.20 | 1-Decyl-3-methylimidazolium bromide                                                         |
| <b>220</b> | IM1-10 Cl         | -5.83  | -4.13 | 1.06 | 0.96  | 1.33 | -0.57 | -5.73 | -2.31 | -1.25 |                    | 477 | 1.23 | 1-Decyl-3-methylimidazolium chloride                                                        |
| <b>221</b> | IM1-10 PF6        | -5.83  | -4.13 | 1.06 | 0.96  | 1.33 | 1.13  | -1.14 | -0.21 | -3.53 |                    | 594 | 1.34 | 1-Decyl-3-methylimidazolium hexafluorophosphate                                             |
| <b>222</b> | IM1-10 (CF3SO2)2N | -5.83  | -4.13 | 1.06 | 0.96  | 1.33 | -1.19 | -2.15 | 2.86  | 2.10  | 754 <sup>b</sup>   | 757 | 0.53 | 1-decyl-3-methylimidazolium 1,1,1-trifluoro-N-[(trifluoromethyl)sulfonyl]methanesulfonamide |
| <b>223</b> | IM1-10 FeCl4      | -5.83  | -4.13 | 1.06 | 0.96  | 1.33 | -4.01 | -4.57 | -0.46 | 0.67  |                    | 565 | 0.90 | 1-decyl-3-methylimidazolium tetrachloroferrate                                              |
| <b>224</b> | IM1-10COO2 Br     | -4.00  | 4.03  | 0.76 | -0.19 | 0.44 | -0.52 | -5.52 | -2.16 | -1.13 |                    | 380 | 2.20 | 1-(11-Ethoxy-11-oxoundecyl)-3-methylimidazolium bromide                                     |
| <b>225</b> | IM1-12 Br         | -7.55  | -3.29 | 0.51 | 1.23  | 1.51 | -0.52 | -5.52 | -2.16 | -1.13 |                    | 536 | 1.38 | 1-Dodecyl-3-methylimidazolium bromide                                                       |
| <b>226</b> | 1201IMCL          | -7.55  | -3.29 | 0.51 | 1.23  | 1.51 | -0.57 | -5.73 | -2.31 | -1.25 |                    | 525 | 1.41 | 1-dodecyl-3-methylimidazolium chloride                                                      |
| <b>227</b> | IM1-14 Cl         | -9.86  | -2.51 | 0.38 | 1.23  | 2.54 | -0.57 | -5.73 | -2.31 | -1.25 |                    | 607 | 1.76 | 1-Methyl-3-tetradecylimidazolium chloride                                                   |
| <b>228</b> | IM1-14 Br         | -9.86  | -2.51 | 0.38 | 1.23  | 2.54 | -0.52 | -5.52 | -2.16 | -1.13 |                    | 618 | 1.73 | 1-Methyl-3-tetradecylimidazolium bromide                                                    |
| <b>229</b> | IM1-16 Cl         | -11.34 | -2.14 | 0.02 | 1.34  | 2.01 | -0.57 | -5.73 | -2.31 | -1.25 |                    | 627 | 1.84 | 1-Hexadecyl-3-methylimidazolium chloride                                                    |
| <b>230</b> | IM1-16 Br         | -11.34 | -2.14 | 0.02 | 1.34  | 2.01 | -0.52 | -5.52 | -2.16 | -1.13 |                    | 638 | 1.82 | 1-Hexadecyl-3-methylimidazolium bromide                                                     |

|            |                     |        |       |       |       |       |       |       |       |       |     |      |                                                                                                         |
|------------|---------------------|--------|-------|-------|-------|-------|-------|-------|-------|-------|-----|------|---------------------------------------------------------------------------------------------------------|
| <b>231</b> | IM1-18 Cl           | -13.76 | -1.31 | -0.02 | 1.21  | 2.84  | -0.57 | -5.73 | -2.31 | -1.25 | 704 | 2.18 | 1-Methyl-3-octadecylimidazolium chloride                                                                |
| <b>232</b> | IM18OH Br           | 2.36   | 3.73  | -0.11 | -1.86 | 3.95  | -0.52 | -5.52 | -2.16 | -1.13 | 321 | 2.19 | 1-(8-Hydroxyoctyl)-3-methylimidazolium bromide                                                          |
| <b>233</b> | IM14OH Cl           | 6.92   | 2.34  | 1.31  | -2.68 | 2.61  | -0.57 | -5.73 | -2.31 | -1.25 | 154 | 1.99 | 1-(4-Hydroxybutyl)-3-methylimidazolium chloride                                                         |
| <b>234</b> | IM13OH Cl           | 8.05   | 2.08  | 2.12  | -3.44 | 2.47  | -0.57 | -5.73 | -2.31 | -1.25 | 113 | 2.09 | 1-(3-Hydroxypropyl)-3-methylimidazolium chloride                                                        |
| <b>235</b> | IM13OH (CF3SO2)2N   | 8.05   | 2.08  | 2.12  | -3.44 | 2.47  | -1.19 | -2.15 | 2.86  | 2.10  | 393 | 2.31 | 1-(3-Hydroxypropyl)-3-methylimidazolium 1,1,1-trifluoro-N-[(trifluoromethyl)sulfonyl]methanesulfonamide |
| <b>236</b> | IM13O1 (CF3SO2)2N   | 4.71   | -1.38 | 0.08  | 0.80  | 0.67  | -1.19 | -2.15 | 2.86  | 2.10  | 485 | 1.09 | 1-(3-Methoxypropyl)-3-methylimidazolium 1,1,1-trifluoro-N-[(trifluoromethyl)sulfonyl]methanesulfonamide |
| <b>237</b> | IM13O1 Cl           | 4.71   | -1.38 | 0.08  | 0.80  | 0.67  | -0.57 | -5.73 | -2.31 | -1.25 | 205 | 0.92 | 1-(3-Methoxypropyl)-3-methylimidazolium chloride                                                        |
| <b>238</b> | IM12OH I            | 9.73   | 2.71  | 2.15  | -3.96 | 2.49  | -0.65 | -5.31 | -1.63 | -1.12 | 98  | 2.34 | 1-(2-Hydroxyethyl)-3-methylimidazolium iodide                                                           |
| <b>239</b> | IM12OH (2-SO2PhCO)N | 9.73   | 2.71  | 2.15  | -3.96 | 2.49  | -0.91 | -0.17 | 1.38  | 3.13  | 342 | 2.70 | 1-(2-Hydroxyethyl)-3-methylimidazolium, salt with 1,2-benzisothiazol-3(2H)-one 1,1-dioxide              |
| <b>240</b> | IM12OH (CF3SO2)2N   | 9.73   | 2.71  | 2.15  | -3.96 | 2.49  | -1.19 | -2.15 | 2.86  | 2.10  | 346 | 2.57 | 1-(2-Hydroxyethyl)-3-methylimidazolium 1,1,1-trifluoro-N-[(trifluoromethyl)sulfonyl]methanesulfonamide  |
| <b>241</b> | IM12OH AC           | 9.73   | 2.71  | 2.15  | -3.96 | 2.49  | 0.38  | -0.22 | 0.92  | 2.67  | 327 | 2.79 | 1-(2-Hydroxyethyl)-3-methylimidazolium 6-methyl-2,2-dioxo-1,2,3-oxathiazin-4(3H)-onate                  |
| <b>242</b> | IM12OH BF4          | 9.73   | 2.71  | 2.15  | -3.96 | 2.49  | 1.67  | -0.06 | -0.33 | -3.83 | 194 | 3.03 | 1-(2-Hydroxyethyl)-3-methylimidazolium tetrafluoroborate                                                |
| <b>243</b> | IM12OH PF6          | 9.73   | 2.71  | 2.15  | -3.96 | 2.49  | 1.13  | -1.14 | -0.21 | -3.53 | 183 | 2.89 | 1-(2-Hydroxyethyl)-3-methylimidazolium hexafluorophosphate                                              |
| <b>244</b> | IM12OH Cl           | 9.73   | 2.71  | 2.15  | -3.96 | 2.49  | -0.57 | -5.73 | -2.31 | -1.25 | 67  | 2.32 | 1-(2-hydroxyethyl)-3-methylimidazolium chloride                                                         |
| <b>245</b> | IM12O1 (CF3SO2)2N   | 6.12   | -1.79 | 1.00  | -0.25 | -0.03 | -1.19 | -2.15 | 2.86  | 2.10  | 417 | 1.25 | 1-(2-Methoxyethyl)-3-methylimidazolium 1,1,1-trifluoro-N-[(trifluoromethyl)sulfonyl]methanesulfonamide  |
| <b>246</b> | IM12O1 Cl           | 6.12   | -1.79 | 1.00  | -0.25 | -0.03 | -0.57 | -5.73 | -2.31 | -1.25 | 138 | 0.88 | 1-(2-Methoxyethyl)-3-methylimidazolium chloride                                                         |
| <b>247</b> | IM12O1 BF4          | 6.12   | -1.79 | 1.00  | -0.25 | -0.03 | 1.67  | -0.06 | -0.33 | -3.83 | 265 | 1.57 | 1-(2-Methoxyethyl)-3-methylimidazolium tetrafluoroborate                                                |
| <b>248</b> | IM12O1 N(CN)2       | 6.12   | -1.79 | 1.00  | -0.25 | -0.03 | -2.48 | 0.49  | 0.00  | 0.73  | 327 | 1.30 | 1-(2-Methoxyethyl)-3-methylimidazolium dicyanamide                                                      |
| <b>249</b> | IM12O2 (CF3SO2)2N   | 4.04   | -2.03 | 1.37  | 0.09  | 0.45  | -1.19 | -2.15 | 2.86  | 2.10  | 484 | 1.00 | 1-(2-Ethoxyethyl)-3-methylimidazolium 1,1,1-trifluoro-N-[(trifluoromethyl)sulfonyl]methanesulfonamide   |
| <b>250</b> | IM12O2 Br           | 4.04   | -2.03 | 1.37  | 0.09  | 0.45  | -0.52 | -5.52 | -2.16 | -1.13 | 215 | 0.78 | 1-(2-Ethoxyethyl)-3-methylimidazolium bromide                                                           |
| <b>251</b> | IM12O2 Cl           | 4.04   | -2.03 | 1.37  | 0.09  | 0.45  | -0.57 | -5.73 | -2.31 | -1.25 | 204 | 0.77 | 1-(2-Ethoxyethyl)-3-methylimidazolium chloride                                                          |
| <b>252</b> | IM12O2O1 Cl         | 5.30   | 1.60  | 0.58  | 1.08  | 0.99  | -0.57 | -5.73 | -2.31 | -1.25 | 194 | 1.53 | 1-[2-(2-Methoxyethoxy)ethyl]-3-methylimidazolium chloride                                               |
| <b>253</b> | IM11O2 (CF3SO2)2N   | 5.01   | -1.83 | -0.67 | 1.85  | 0.11  | -1.19 | -2.15 | 2.86  | 2.10  | 478 | 1.15 | 1-(Ethoxymethyl)-3-methylimidazolium 1,1,1-trifluoro-N-[(trifluoromethyl)sulfonyl]methanesulfonamide    |
| <b>254</b> | IM11O2 Cl           | 5.01   | -1.83 | -0.67 | 1.85  | 0.11  | -0.57 | -5.73 | -2.31 | -1.25 | 199 | 0.98 | 1-(Ethoxymethyl)-3-methylimidazolium chloride                                                           |
| <b>255</b> | Py1O(Cdd)-3CONH2 Cl | -1.11  | 8.51  | 2.67  | -2.27 | -1.31 | -0.57 | -5.73 | -2.31 | -1.25 | 204 | 3.52 | 3-(Aminocarbonyl)-1-[(cyclododecyloxy)methyl]pyridinium chloride                                        |
| <b>256</b> | Py1O-10-3CONH2 Cl   | -1.45  | 8.05  | 2.07  | -2.56 | -0.26 | -0.57 | -5.73 | -2.31 | -1.25 | 243 | 3.24 | 3-(Aminocarbonyl)-1-[(decyloxy)methyl]pyridinium chloride                                               |

|            |                                      |        |       |      |       |       |       |       |       |       |     |      |                                                                                                       |
|------------|--------------------------------------|--------|-------|------|-------|-------|-------|-------|-------|-------|-----|------|-------------------------------------------------------------------------------------------------------|
| <b>257</b> | Py10-10-3CONH2<br>FeCl4              | -1.45  | 8.05  | 2.07 | -2.56 | -0.26 | -4.01 | -4.57 | -0.46 | 0.67  | 330 | 3.00 | 3-(Aminocarbonyl)-1-[(decyloxy)methyl]pyridinium (T-4)-tetrachloroferrate                             |
| <b>258</b> | Py10-11-3CONH2 Cl                    | -3.36  | 8.53  | 2.80 | -2.69 | -0.26 | -0.57 | -5.73 | -2.31 | -1.25 | 282 | 3.44 | 3-(Aminocarbonyl)-1-[(undecyloxy)methyl]pyridinium chloride                                           |
| <b>259</b> | Py10-12-3CONH2<br>1COO               | -3.72  | 9.72  | 2.10 | -2.74 | 0.54  | 4.20  | 2.41  | -5.87 | 3.73  | 419 | 4.46 | 3-(Aminocarbonyl)-1-[(dodecyloxy)methyl]pyridinium acetate                                            |
| <b>260</b> | Py10-12-3CONH2 BF4                   | -3.72  | 9.72  | 2.10 | -2.74 | 0.54  | 1.67  | -0.06 | -0.33 | -3.83 | 439 | 4.11 | 3-(Aminocarbonyl)-1-[(dodecyloxy)methyl]pyridinium tetrafluoroborate                                  |
| <b>261</b> | Py10-12-3CONH2 Br                    | -3.72  | 9.72  | 2.10 | -2.74 | 0.54  | -0.52 | -5.52 | -2.16 | -1.13 | 322 | 3.58 | 3-(Aminocarbonyl)-1-[(dodecyloxy)methyl]pyridinium bromide                                            |
| <b>262</b> | Py10-12-3CONH2 Cl                    | -3.72  | 9.72  | 2.10 | -2.74 | 0.54  | -0.57 | -5.73 | -2.31 | -1.25 | 312 | 3.57 | 3-(Aminocarbonyl)-1-[(dodecyloxy)methyl]pyridinium chloride                                           |
| <b>263</b> | Py10-12-3CONH2<br>ClO4               | -3.72  | 9.72  | 2.10 | -2.74 | 0.54  | 2.67  | 3.01  | -0.12 | -1.50 | 535 | 4.26 | 3-(Aminocarbonyl)-1-[(dodecyloxy)methyl]pyridinium perchlorate                                        |
| <b>264</b> | Py10-12-3CONH2 I                     | -3.72  | 9.72  | 2.10 | -2.74 | 0.54  | -0.65 | -5.31 | -1.63 | -1.12 | 343 | 3.57 | 3-(Aminocarbonyl)-1-[(dodecyloxy)methyl]pyridinium iodide                                             |
| <b>265</b> | Py10-12-3CONH2<br>NO3                | -3.72  | 9.72  | 2.10 | -2.74 | 0.54  | -6.94 | -0.46 | -2.37 | -1.73 | 336 | 3.54 | 3-(Aminocarbonyl)-1-[(dodecyloxy)methyl]pyridinium nitrate                                            |
| <b>266</b> | Py4-3CONHBu 8OSO3                    | -0.50  | 1.56  | 3.74 | -1.41 | -2.27 | -1.48 | -1.82 | 3.86  | 4.62  | 546 | 2.47 | 1-Butyl-3-[(butylamino)carbonyl]pyridinium octyl sulfate                                              |
| <b>267</b> | Py4-3CONHBu I                        | -0.50  | 1.56  | 3.74 | -1.41 | -2.27 | -0.65 | -5.31 | -1.63 | -1.12 | 222 | 2.23 | 1-Butyl-3-[(butylamino)carbonyl]pyridinium iodide                                                     |
| <b>268</b> | Py107-3CONH(MeO-<br>MeO-Hp) Cl       | -8.10  | 11.70 | 3.19 | 0.15  | -1.79 | -0.57 | -5.73 | -2.31 | -1.25 | 368 | 4.52 | 3-[[[(Heptyloxy)methoxy)methyl]amino]carbonyl]-1-[[heptyloxy)methyl]pyridinium chloride               |
| <b>269</b> | Py108-3CONH(MeO-<br>MeO-Oc) Cl       | -9.18  | 13.37 | 1.88 | 0.56  | -3.29 | -0.57 | -5.73 | -2.31 | -1.25 | 352 | 5.21 | 3-[[[(Octyloxy)methoxy)methyl]amino]carbonyl]-1-[[octyloxy)methyl]pyridinium chloride                 |
| <b>270</b> | Py109-3CONH(MeO-<br>MeO-No) Cl       | -11.41 | 14.87 | 2.97 | 0.32  | -6.01 | -0.57 | -5.73 | -2.31 | -1.25 | 311 | 6.34 | 3-[[[(Nonyloxy)methoxy)methyl]amino]carbonyl]-1-[[nonyloxy)methyl]pyridinium chloride                 |
| <b>271</b> | Py10-10-<br>3CONH(MeO-MeO-<br>De) Cl | -14.01 | 15.45 | 3.67 | -0.31 | -4.11 | -0.57 | -5.73 | -2.31 | -1.25 | 417 | 6.12 | 3-[[[(Decyloxy)methoxy)methyl]amino]carbonyl]-1-[[decyloxy)methyl]pyridinium chloride                 |
| <b>272</b> | Py1-3COOBu<br>(CF3SO2)2N             | 2.74   | 1.39  | 1.45 | 0.46  | -2.32 | -1.19 | -2.15 | 2.86  | 2.10  | 424 | 2.16 | 3-(Butoxycarbonyl)-1-methylpyridinium 1,1,1-trifluoro-N-[[trifluoromethyl]sulfonyl]methanesulfonamide |
| <b>273</b> | Py1-3COOBu 8OSO3                     | 2.74   | 1.39  | 1.45 | 0.46  | -2.32 | -1.48 | -1.82 | 3.86  | 4.62  | 500 | 2.28 | 3-(Butoxycarbonyl)-1-methylpyridinium octyl sulfate                                                   |
| <b>274</b> | Py1-3COOBu I                         | 2.74   | 1.39  | 1.45 | 0.46  | -2.32 | -0.65 | -5.31 | -1.63 | -1.12 | 175 | 1.97 | 3-(Butoxycarbonyl)-1-methylpyridinium iodide                                                          |
| <b>275</b> | Py1-3COOBu PF6                       | 2.74   | 1.39  | 1.45 | 0.46  | -2.32 | 1.13  | -1.14 | -0.21 | -3.53 | 260 | 2.26 | 3-(Butoxycarbonyl)-1-methylpyridinium hexafluorophosphate                                             |
| <b>276</b> | Py4-3COOBu 8OSO3                     | -0.63  | 1.72  | 1.77 | 0.78  | -1.80 | -1.48 | -1.82 | 3.86  | 4.62  | 596 | 2.13 | 3-(Butoxycarbonyl)-1-butylpyridinium octyl sulfate                                                    |
| <b>277</b> | Py4-3COOBu I                         | -0.63  | 1.72  | 1.77 | 0.78  | -1.80 | -0.65 | -5.31 | -1.63 | -1.12 | 271 | 1.98 | 3-(Butoxycarbonyl)-1-butylpyridinium iodide                                                           |
| <b>278</b> | Py4-3Me-4Me BF4                      | -1.83  | -6.48 | 3.18 | -0.01 | -0.44 | 1.67  | -0.06 | -0.33 | -3.83 | 448 | 0.94 | 1-Butyl-3,4-dimethylpyridinium tetrafluoroborate                                                      |
| <b>279</b> | Py4-3Me-4Me Cl                       | -1.83  | -6.48 | 3.18 | -0.01 | -0.44 | -0.57 | -5.73 | -2.31 | -1.25 | 321 | 1.01 | 1-Butyl-3,4-dimethylpyridinium chloride                                                               |
| <b>280</b> | Py4-3Me-5Me N(CN)2                   | -3.35  | -6.65 | 3.68 | -0.65 | 0.01  | -2.48 | 0.49  | 0.00  | 0.73  | 550 | 1.19 | 1-Butyl-3,5-dimethylpyridinium N-cyanocyanamide                                                       |
| <b>281</b> | Py4-3Me-5Me Br                       | -3.35  | -6.65 | 3.68 | -0.65 | 0.01  | -0.52 | -5.52 | -2.16 | -1.13 | 371 | 1.26 | 1-Butyl-3,5-dimethylpyridinium bromide                                                                |

|            |                        |       |       |      |       |       |       |       |       |       |                  |     |      |                                                                                                        |
|------------|------------------------|-------|-------|------|-------|-------|-------|-------|-------|-------|------------------|-----|------|--------------------------------------------------------------------------------------------------------|
| <b>282</b> | Py4-3Me-5Me BF4        | -3.35 | -6.65 | 3.68 | -0.65 | 0.01  | 1.67  | -0.06 | -0.33 | -3.83 |                  | 488 | 1.23 | 1-Butyl-3,5-dimethylpyridinium tetrafluoroborate                                                       |
| <b>283</b> | Py4-3Me-5Me Cl         | -3.35 | -6.65 | 3.68 | -0.65 | 0.01  | -0.57 | -5.73 | -2.31 | -1.25 |                  | 361 | 1.29 | 1-Butyl-3,5-dimethylpyridinium chloride                                                                |
| <b>284</b> | Py4-3Me-5Me (CF3SO2)2N | -3.35 | -6.65 | 3.68 | -0.65 | 0.01  | -1.19 | -2.15 | 2.86  | 2.10  |                  | 640 | 1.09 | 1-butyl-3,5-dimethyl pyridinium 1,1,1-trifluoro-N-[(trifluoromethyl)sulfonyl]methanesulfonamide        |
| <b>285</b> | Py8-3Me-5Me Br         | -7.40 | -4.91 | 2.82 | -0.43 | 1.31  | -0.52 | -5.52 | -2.16 | -1.13 |                  | 504 | 1.54 | 1-octyl-3,5-dimethylpyridinium bromide                                                                 |
| <b>286</b> | Py8-3Me-5Me (CF3SO2)2N | -7.40 | -4.91 | 2.82 | -0.43 | 1.31  | -1.19 | -2.15 | 2.86  | 2.10  |                  | 773 | 1.07 | 1-octyl-3,5-dimethylpyridinium bromide 1,1,1-trifluoro-N-[(trifluoromethyl)sulfonyl]methanesulfonamide |
| <b>287</b> | Py3-3Me Br             | 0.18  | -7.09 | 3.15 | 0.16  | -0.85 | -0.52 | -5.52 | -2.16 | -1.13 |                  | 277 | 0.88 | 3-Methyl-1-propylpyridinium bromide                                                                    |
| <b>288</b> | Py3-3Me PF6            | 0.18  | -7.09 | 3.15 | 0.16  | -0.85 | 1.13  | -1.14 | -0.21 | -3.53 |                  | 382 | 0.72 | 3-Methyl-1-propylpyridinium hexafluorophosphate                                                        |
| <b>289</b> | Py4-3Me N(CN)2         | -1.02 | -6.72 | 3.14 | 0.02  | -0.45 | -2.48 | 0.49  | 0.00  | 0.73  |                  | 492 | 0.96 | 1-Butyl-3-methylpyridinium N-cyanocyanamide                                                            |
| <b>290</b> | Py4-3Me Br             | -1.02 | -6.72 | 3.14 | 0.02  | -0.45 | -0.52 | -5.52 | -2.16 | -1.13 |                  | 313 | 0.94 | 1-Butyl-3-methylpyridinium bromide                                                                     |
| <b>291</b> | Py4-3Me 8OSO3          | -1.02 | -6.72 | 3.14 | 0.02  | -0.45 | -1.48 | -1.82 | 3.86  | 4.62  |                  | 659 | 1.15 | 1-Butyl-3-methylpyridinium octyl sulfate                                                               |
| <b>292</b> | Py4-3Me BF4            | -1.02 | -6.72 | 3.14 | 0.02  | -0.45 | 1.67  | -0.06 | -0.33 | -3.83 | 388 <sup>a</sup> | 430 | 0.91 | 1-Butyl-3-methylpyridinium tetrafluoroborate                                                           |
| <b>293</b> | Py4-3Me Cl             | -1.02 | -6.72 | 3.14 | 0.02  | -0.45 | -0.57 | -5.73 | -2.31 | -1.25 |                  | 303 | 0.96 | 1-Butyl-3-methylpyridinium chloride                                                                    |
| <b>294</b> | Py4-3Me PF6            | -1.02 | -6.72 | 3.14 | 0.02  | -0.45 | 1.13  | -1.14 | -0.21 | -3.53 |                  | 419 | 0.84 | 1-Butyl-3-methylpyridinium hexafluorophosphate                                                         |
| <b>295</b> | Py6-3Me Br             | -3.03 | -5.66 | 2.50 | 0.25  | 0.50  | -0.52 | -5.52 | -2.16 | -1.13 | 343 <sup>a</sup> | 390 | 1.03 | 1-Hexyl-3-methylpyridinium bromide                                                                     |
| <b>296</b> | Py6-3Me Cl             | -3.03 | -5.66 | 2.50 | 0.25  | 0.50  | -0.57 | -5.73 | -2.31 | -1.25 |                  | 379 | 1.03 | 1-Hexyl-3-methylpyridinium chloride                                                                    |
| <b>297</b> | Py8-3Me Br             | -5.44 | -5.13 | 2.92 | -0.28 | 1.42  | -0.52 | -5.52 | -2.16 | -1.13 |                  | 464 | 1.39 | 3-Methyl-1-octylpyridinium bromide                                                                     |
| <b>298</b> | Py8-3Me Cl             | -5.44 | -5.13 | 2.92 | -0.28 | 1.42  | -0.57 | -5.73 | -2.31 | -1.25 |                  | 453 | 1.41 | 3-Methyl-1-octylpyridinium chloride                                                                    |
| <b>299</b> | Py1O3-3OH (2-SO2PhCO)N | 9.04  | 2.53  | 1.71 | 1.07  | 2.30  | -0.91 | -0.17 | 1.38  | 3.13  |                  | 415 | 2.30 | 3-Hydroxy-1-(propoxymethyl)pyridinium, salt with 1,2-benzisothiazol-3(2H)-one 1,1-dioxide              |
| <b>300</b> | Py1O3-3OH AC           | 9.04  | 2.53  | 1.71 | 1.07  | 2.30  | 0.38  | -0.22 | 0.92  | 2.67  |                  | 400 | 2.40 | 3-Hydroxy-1-(propoxymethyl)pyridinium 6-methyl-2,2-dioxo-1,2,3-oxathiazin-4(3H)-onate                  |
| <b>301</b> | Py1O3-3OH Cl           | 9.04  | 2.53  | 1.71 | 1.07  | 2.30  | -0.57 | -5.73 | -2.31 | -1.25 |                  | 139 | 1.98 | 3-Hydroxy-1-(propoxymethyl)pyridinium chloride                                                         |
| <b>302</b> | Py1O4-3OH (2-SO2PhCO)N | 7.76  | 2.79  | 1.60 | 1.11  | 2.48  | -0.91 | -0.17 | 1.38  | 3.13  |                  | 450 | 2.25 | 1-(Butoxymethyl)-3-hydroxypyridinium, salt with 1,2-benzisothiazol-3(2H)-one 1,1-dioxide               |
| <b>303</b> | Py1O4-3OH AC           | 7.76  | 2.79  | 1.60 | 1.11  | 2.48  | 0.38  | -0.22 | 0.92  | 2.67  |                  | 435 | 2.36 | 1-(Butoxymethyl)-3-hydroxypyridinium 6-methyl-2,2-dioxo-1,2,3-oxathiazin-4(3H)-onate                   |
| <b>304</b> | Py1O6-3OH (2-SO2PhCO)N | 5.49  | 3.42  | 1.24 | 1.23  | 3.06  | -0.91 | -0.17 | 1.38  | 3.13  |                  | 521 | 2.24 | 1-[(Hexyloxy)methyl]-3-hydroxypyridinium, salt with 1,2-benzisothiazol-3(2H)-one 1,1-dioxide           |
| <b>305</b> | Py1O6-3OH AC           | 5.49  | 3.42  | 1.24 | 1.23  | 3.06  | 0.38  | -0.22 | 0.92  | 2.67  |                  | 506 | 2.37 | 1-[(Hexyloxy)methyl]-3-hydroxypyridinium 6-methyl-2,2-dioxo-1,2,3-oxathiazin-4(3H)-onate               |
| <b>306</b> | Py1O7-3OH (2-SO2PhCO)N | 4.71  | 3.35  | 1.30 | 1.26  | 2.71  | -0.91 | -0.17 | 1.38  | 3.13  |                  | 529 | 2.15 | 1-[(Heptyloxy)methyl]-3-hydroxypyridinium, salt with 1,2-benzisothiazol-3(2H)-one 1,1-dioxide          |
| <b>307</b> | Py1O7-3OH AC           | 4.71  | 3.35  | 1.30 | 1.26  | 2.71  | 0.38  | -0.22 | 0.92  | 2.67  |                  | 514 | 2.28 | 1-[(Heptyloxy)methyl]-3-hydroxypyridinium 6-methyl-2,2-dioxo-1,2,3-oxathiazin-4(3H)-onate              |



|            |                                                                       |        |       |       |       |       |        |       |       |       |                  |      |                                                                                                  |                                              |
|------------|-----------------------------------------------------------------------|--------|-------|-------|-------|-------|--------|-------|-------|-------|------------------|------|--------------------------------------------------------------------------------------------------|----------------------------------------------|
| <b>308</b> | Py1O7-3OH Cl                                                          | 4.71   | 3.35  | 1.30  | 1.26  | 2.71  | -0.57  | -5.73 | -2.31 | -1.25 | 253              | 1.98 | 1-[(Heptyloxy)methyl]-3-hydroxypyridinium chloride                                               |                                              |
| <b>309</b> | Py1O-11-3OH (2-SO <sub>2</sub> PhCO)N                                 | -0.18  | 4.26  | 1.07  | 0.69  | 4.01  | -0.91  | -0.17 | 1.38  | 3.13  | 672              | 2.21 | 3-Hydroxy-1-[(undecyloxy)methyl]pyridinium, salt with 1,2-benzisothiazol-3(2H)-one 1,1-dioxide   |                                              |
| <b>310</b> | Py1O-11-3OH AC                                                        | -0.18  | 4.26  | 1.07  | 0.69  | 4.01  | 0.38   | -0.22 | 0.92  | 2.67  | 657              | 2.38 | 3-Hydroxy-1-[(undecyloxy)methyl]pyridinium 6-methyl-2,2-dioxo-1,2,3-oxathiazin-4(3H)-onate       |                                              |
| <b>311</b> | Py1O-11-3OH Cl                                                        | -0.18  | 4.26  | 1.07  | 0.69  | 4.01  | -0.57  | -5.73 | -2.31 | -1.25 | 396              | 2.23 | 3-Hydroxy-1-[(undecyloxy)methyl]pyridinium chloride                                              |                                              |
| <b>312</b> | Py1O-18-3OH (2-SO <sub>2</sub> PhCO)N                                 | -7.03  | 6.97  | -0.02 | 0.65  | 4.92  | -0.91  | -0.17 | 1.38  | 3.13  | 852              | 2.70 | 3-Hydroxy-1-[(octadecyloxy)methyl]pyridinium, salt with 1,2-benzisothiazol-3(2H)-one 1,1-dioxide |                                              |
| <b>313</b> | Py1O-18-3OH AC                                                        | -7.03  | 6.97  | -0.02 | 0.65  | 4.92  | 0.38   | -0.22 | 0.92  | 2.67  | 837              | 2.88 | 3-Hydroxy-1-[(octadecyloxy)methyl]pyridinium 6-methyl-2,2-dioxo-1,2,3-oxathiazin-4(3H)-onate     |                                              |
| <b>314</b> | Pyr24 2OSO <sub>3</sub>                                               | 1.25   | -3.90 | -3.89 | 5.76  | 0.08  | 1.13   | -1.47 | -0.18 | -0.39 | 511              | 1.83 | 1-Butyl-1-ethylpyrrolidinium ethyl sulfate                                                       |                                              |
| <b>315</b> | IMi022OH-2-(8=9)2OSO <sub>3</sub>                                     | -12.25 | 6.23  | -6.24 | -8.83 | 3.20  | 1.13   | -1.47 | -0.18 | -0.39 | 716              | 4.27 | 1-ethyl-2-(8-heptadecenyl)-4,5-dihydro-3-(2-hydroxyethyl)imidazolium ethyl sulfate               |                                              |
| <b>316</b> | IM22 (CF <sub>3</sub> SO <sub>2</sub> ) <sub>2</sub> N                | 2.03   | -6.56 | 1.57  | 1.51  | -0.99 | -1.19  | -2.15 | 2.86  | 2.10  | 518              | 0.77 | 1,3-Diethylimidazolium 1,1,1-trifluoro-N-[(trifluoromethyl)sulfonyl]methanesulfonamide           |                                              |
| <b>317</b> | IM22 Br                                                               | 2.03   | -6.56 | 1.57  | 1.51  | -0.99 | -0.52  | -5.52 | -2.16 | -1.13 | 249              | 0.60 | 1,3-Diethylimidazolium bromide                                                                   |                                              |
| <b>318</b> | IM23 (CF <sub>3</sub> SO <sub>2</sub> ) <sub>2</sub> N                | 1.10   | -6.31 | 1.51  | 1.58  | -0.99 | -1.19  | -2.15 | 2.86  | 2.10  | 540              | 0.70 | 1-Ethyl-3-propylimidazolium 1,1,1-trifluoro-N-[(trifluoromethyl)sulfonyl]methanesulfonamide      |                                              |
| <b>319</b> | IM23 Br                                                               | 1.10   | -6.31 | 1.51  | 1.58  | -0.99 | -0.52  | -5.52 | -2.16 | -1.13 | 271              | 0.62 | 1-Ethyl-3-propylimidazolium bromide                                                              |                                              |
| <b>320</b> | IM24 BF <sub>4</sub>                                                  | -0.12  | -5.99 | 1.68  | 1.39  | -0.48 | 1.67   | -0.06 | -0.33 | -3.83 | 427              | 0.71 | 1-Butyl-3-ethylimidazolium tetrafluoroborate                                                     |                                              |
| <b>321</b> | IM24 CF <sub>3</sub> COO                                              | -0.12  | -5.99 | 1.68  | 1.39  | -0.48 | 3.18   | 2.08  | -2.30 | -0.22 | 457              | 0.84 | 1-Butyl-3-ethylimidazolium trifluoroacetate                                                      |                                              |
| <b>322</b> | IM24 CF <sub>3</sub> SO <sub>3</sub>                                  | -0.12  | -5.99 | 1.68  | 1.39  | -0.48 | 1.41   | -0.86 | 0.07  | -2.60 | 447              | 0.49 | 1-Butyl-3-ethylimidazolium trifluoromethanesulfonate                                             |                                              |
| <b>323</b> | IM26 BF <sub>4</sub>                                                  | -2.72  | -5.19 | 1.84  | 0.95  | 0.87  | 1.67   | -0.06 | -0.33 | -3.83 | 520              | 1.14 | 1-Ethyl-3-hexylimidazolium tetrafluoroborate                                                     |                                              |
| <b>324</b> | IM26 Br                                                               | -2.72  | -5.19 | 1.84  | 0.95  | 0.87  | -0.52  | -5.52 | -2.16 | -1.13 | 403              | 0.94 | 1-Ethyl-3-hexylimidazolium bromide                                                               |                                              |
| <b>325</b> | IM2-10 Br                                                             | -6.83  | -4.25 | 2.07  | 0.24  | 1.15  | -0.52  | -5.52 | -2.16 | -1.13 | 494              | 1.35 | 1-Decyl-3-ethylimidazolium bromide                                                               |                                              |
| <b>326</b> | IM1-(1Ph)(CF <sub>3</sub> SO <sub>2</sub> ) <sub>2</sub> N            | -0.83  | -6.52 | 3.35  | -0.20 | -1.72 | -1.19  | -2.15 | 2.86  | 2.10  | 536              | 1.12 | 1-benzyl-3-methylimidazolium 1,1,1-trifluoro-N-[(trifluoromethyl)sulfonyl]methanesulfonamide     |                                              |
| <b>327</b> | IM4-(1Ph)(CF <sub>3</sub> SO <sub>2</sub> ) <sub>2</sub> N            | -4.16  | -5.71 | 3.48  | -0.32 | -0.57 | -1.19  | -2.15 | 2.86  | 2.10  | 643              | 1.02 | 1-benzyl-3-butylimidazolium 1,1,1-trifluoro-N-[(trifluoromethyl)sulfonyl]methanesulfonamide      |                                              |
| <b>328</b> | Py1O-10-4CONH <sub>2</sub> Cl                                         | -0.84  | 8.71  | 2.60  | -2.76 | 0.20  | -0.57  | -5.73 | -2.31 | -1.25 | 236              | 3.35 | 4-(Aminocarbonyl)-1-[(decyloxy)methyl]pyridinium chloride                                        |                                              |
| <b>329</b> | Py1O-11-4CONH <sub>2</sub> Cl                                         | -1.97  | 9.29  | 2.71  | -2.72 | 0.30  | -0.57  | -5.73 | -2.31 | -1.25 | 264              | 3.49 | 4-(Aminocarbonyl)-1-[(undecyloxy)methyl]pyridinium chloride                                      |                                              |
| <b>330</b> | Py1O-12-4CONH <sub>2</sub> Cl                                         | -3.23  | 9.40  | 3.02  | -3.16 | 0.39  | -0.57  | -5.73 | -2.31 | -1.25 | 289              | 3.58 | 4-(Aminocarbonyl)-1-[(dodecyloxy)methyl]pyridinium chloride                                      |                                              |
| <b>331</b> | Py4-4Me BF <sub>4</sub>                                               | -0.22  | -6.95 | 3.85  | -0.06 | -0.45 | 1.67   | -0.06 | -0.33 | -3.83 | 414 <sup>a</sup> | 409  | 0.98                                                                                             | 1-Butyl-4-methylpyridinium tetrafluoroborate |
| <b>332</b> | Py4-4Me (C <sub>2</sub> F <sub>5</sub> ) <sub>3</sub> PF <sub>3</sub> | -0.22  | -6.95 | 3.85  | -0.06 | -0.45 | 2.83   | 3.03  | 4.77  | -1.46 | 676              | 1.04 | 1-Butyl-4-methylpyridinium trifluorotris(pentafluoroethyl)phosphate                              |                                              |
| <b>333</b> | Py4-4Me B(CN) <sub>4</sub>                                            | -0.22  | -6.95 | 3.85  | -0.06 | -0.45 | -10.53 | 7.57  | -0.53 | -2.02 | 458              | 2.97 | 1-Butyl-4-methylpyridinium tetracyanoborate                                                      |                                              |

|            |                         |        |       |      |       |       |        |       |       |       |                  |      |                                                                                                         |                                                                                                         |
|------------|-------------------------|--------|-------|------|-------|-------|--------|-------|-------|-------|------------------|------|---------------------------------------------------------------------------------------------------------|---------------------------------------------------------------------------------------------------------|
| <b>334</b> | Py4-4Me Cl              | -0.22  | -6.95 | 3.85 | -0.06 | -0.45 | -0.57  | -5.73 | -2.31 | -1.25 | 282              | 1.04 | 1-Butyl-4-methylpyridinium chloride                                                                     |                                                                                                         |
| <b>335</b> | Py4-4Me PF6             | -0.22  | -6.95 | 3.85 | -0.06 | -0.45 | 1.13   | -1.14 | -0.21 | -3.53 | 398              | 0.92 | 1-Butyl-4-methylpyridinium hexafluorophosphate                                                          |                                                                                                         |
| <b>336</b> | Py4-4Me C(CN)3          | -0.22  | -6.95 | 3.85 | -0.06 | -0.45 | -13.16 | 6.89  | -1.96 | -0.13 | 409              | 3.31 | 1-butyl-4-methylpyridinium tricyanomethanide                                                            |                                                                                                         |
| <b>337</b> | Py6-4Me BF4             | -2.88  | -5.97 | 3.94 | -0.40 | 1.13  | 1.67   | -0.06 | -0.33 | -3.83 | 511              | 1.45 | 1-Hexyl-4-methylpyridinium tetrafluoroborate                                                            |                                                                                                         |
| <b>338</b> | Py6-4Me Cl              | -2.88  | -5.97 | 3.94 | -0.40 | 1.13  | -0.57  | -5.73 | -2.31 | -1.25 | 384              | 1.36 | 1-Hexyl-4-methylpyridinium chloride                                                                     |                                                                                                         |
| <b>339</b> | Py8-4Me BF4             | -4.69  | -5.10 | 3.21 | 0.18  | 1.30  | 1.67   | -0.06 | -0.33 | -3.83 | 564              | 1.47 | 4-Methyl-1-octylpyridinium tetrafluoroborate                                                            |                                                                                                         |
| <b>340</b> | Py8-4Me Cl              | -4.69  | -5.10 | 3.21 | 0.18  | 1.30  | -0.57  | -5.73 | -2.31 | -1.25 | 437              | 1.34 | 4-Methyl-1-octylpyridinium chloride                                                                     |                                                                                                         |
| <b>341</b> | Py1-4NMe2 I             | 1.97   | -8.24 | 4.64 | -1.89 | -2.88 | -0.65  | -5.31 | -1.63 | -1.12 | 169              | 1.49 | 4-(Dimethylamino)-1-methylpyridinium iodide                                                             |                                                                                                         |
| <b>342</b> | Py2-4NMe2<br>(CF3SO2)2N | 1.55   | -7.82 | 4.30 | -1.27 | -2.67 | -1.19  | -2.15 | 2.86  | 2.10  | 441              | 1.60 | 4-(Dimethylamino)-1-ethylpyridinium 1,1,1-trifluoro-N-<br>[(trifluoromethyl)sulfonyl]methanesulfonamide |                                                                                                         |
| <b>343</b> | Py2-4NMe2 Br            | 1.55   | -7.82 | 4.30 | -1.27 | -2.67 | -0.52  | -5.52 | -2.16 | -1.13 | 172              | 1.32 | 4-(Dimethylamino)-1-ethylpyridinium bromide                                                             |                                                                                                         |
| <b>344</b> | Py4-4NMe2<br>(CF3SO2)2N | -0.73  | -6.95 | 4.30 | -1.12 | -1.38 | -1.19  | -2.15 | 2.86  | 2.10  | 531              | 1.32 | 1-Butyl-4-(dimethylamino)pyridinium 1,1,1-trifluoro-N-<br>[(trifluoromethyl)sulfonyl]methanesulfonamide |                                                                                                         |
| <b>345</b> | Py4-4NMe2 Br            | -0.73  | -6.95 | 4.30 | -1.12 | -1.38 | -0.52  | -5.52 | -2.16 | -1.13 | 262              | 1.22 | 1-Butyl-4-(dimethylamino)pyridinium bromide                                                             |                                                                                                         |
| <b>346</b> | Py4-4NMe2 Cl            | -0.73  | -6.95 | 4.30 | -1.12 | -1.38 | -0.57  | -5.73 | -2.31 | -1.25 | 251              | 1.23 | 1-Butyl-4-(dimethylamino)pyridinium chloride                                                            |                                                                                                         |
| <b>347</b> | Py6-4NMe2<br>(CF3SO2)2N | -3.42  | -6.49 | 5.27 | -1.90 | -0.04 | -1.19  | -2.15 | 2.86  | 2.10  | 628 <sup>a</sup> | 619  | 1.58                                                                                                    | 4-(Dimethylamino)-1-hexylpyridinium 1,1,1-trifluoro-N-<br>[(trifluoromethyl)sulfonyl]methanesulfonamide |
| <b>348</b> | Py6-4NMe2 Cl            | -3.42  | -6.49 | 5.27 | -1.90 | -0.04 | -0.57  | -5.73 | -2.31 | -1.25 | 340              | 1.64 | 4-(Dimethylamino)-1-hexylpyridinium chloride                                                            |                                                                                                         |
| <b>349</b> | IM33 (CF3SO2)2N         | -0.15  | -5.93 | 1.74 | 1.28  | -0.21 | -1.19  | -2.15 | 2.86  | 2.10  | 587              | 0.50 | 1,3-Dipropylimidazolium 1,1,1-trifluoro-N-<br>[(trifluoromethyl)sulfonyl]methanesulfonamide             |                                                                                                         |
| <b>350</b> | IM44 (CF3SO2)2N         | -2.22  | -5.41 | 1.53 | 1.53  | -0.31 | -1.19  | -2.15 | 2.86  | 2.10  | 634              | 0.43 | 1,3-Dibutylimidazolium 1,1,1-trifluoro-N-<br>[(trifluoromethyl)sulfonyl]methanesulfonamide              |                                                                                                         |
| <b>351</b> | IM42OH Cl               | 6.56   | 2.86  | 1.24 | -2.46 | 1.82  | -0.57  | -5.73 | -2.31 | -1.25 | 140              | 1.96 | 1-butyl-3-(2-hydroxyethyl)imidazolium chloride                                                          |                                                                                                         |
| <b>352</b> | Quin1O6-6Me Cl          | -3.71  | -1.36 | 2.43 | -0.72 | -0.06 | -0.57  | -5.73 | -2.31 | -1.25 | 353              | 1.33 | 1-[(Hexyloxy)methyl]-6-methylquinolinium chloride                                                       |                                                                                                         |
| <b>353</b> | Quin1O8-6Me Cl          | -6.17  | -0.01 | 1.74 | -0.12 | 0.87  | -0.57  | -5.73 | -2.31 | -1.25 | 443              | 1.58 | 6-Methyl-1-[(octyloxy)methyl]quinolinium chloride                                                       |                                                                                                         |
| <b>354</b> | Quin1O-10-6Me Cl        | -8.33  | -0.33 | 2.01 | -0.49 | 0.96  | -0.57  | -5.73 | -2.31 | -1.25 | 492              | 1.76 | 1-[(Decyloxy)methyl]-6-methylquinolinium chloride                                                       |                                                                                                         |
| <b>355</b> | Quin1O-12-6Me Cl        | -10.30 | 0.77  | 1.45 | 0.40  | 1.01  | -0.57  | -5.73 | -2.31 | -1.25 | 547              | 2.01 | 1-[(Dodecyloxy)methyl]-6-methylquinolinium chloride                                                     |                                                                                                         |
| <b>356</b> | Quin1O6-8OH Cl          | -0.56  | 0.61  | 4.16 | -2.65 | 1.01  | -0.57  | -5.73 | -2.31 | -1.25 | 277              | 1.81 | 1-[(Hexyloxy)methyl]-8-hydroxyquinolinium chloride                                                      |                                                                                                         |
| <b>357</b> | Quin1O8-8OH Cl          | -2.66  | 1.72  | 3.00 | -1.66 | 2.18  | -0.57  | -5.73 | -2.31 | -1.25 | 373              | 1.86 | 8-Hydroxy-1-[(octyloxy)methyl]quinolinium chloride                                                      |                                                                                                         |
| <b>358</b> | Quin1O-10-8OH Cl        | -4.64  | 2.67  | 2.11 | -0.97 | 2.53  | -0.57  | -5.73 | -2.31 | -1.25 | 437              | 2.00 | 1-[(Decyloxy)methyl]-8-hydroxyquinolinium chloride                                                      |                                                                                                         |
| <b>359</b> | Quin1O-12-8OH Cl        | -7.05  | 3.58  | 1.77 | -1.52 | 3.02  | -0.57  | -5.73 | -2.31 | -1.25 | 499              | 2.30 | 1-[(Dodecyloxy)methyl]-8-hydroxyquinolinium chloride                                                    |                                                                                                         |

|            |                                   |       |       |       |       |       |       |       |       |       |     |      |                                                                                                   |
|------------|-----------------------------------|-------|-------|-------|-------|-------|-------|-------|-------|-------|-----|------|---------------------------------------------------------------------------------------------------|
| <b>360</b> | Quin4 BF4                         | -3.22 | -7.41 | 6.68  | -2.67 | -0.32 | 1.67  | -0.06 | -0.33 | -3.83 | 443 | 1.91 | 1-Butylquinolinium tetrafluoroborate                                                              |
| <b>361</b> | Quin4 Br                          | -3.22 | -7.41 | 6.68  | -2.67 | -0.32 | -0.52 | -5.52 | -2.16 | -1.13 | 327 | 1.98 | 1-Butylquinolinium bromide                                                                        |
| <b>362</b> | Quin6 BF4                         | -5.56 | -6.58 | 6.69  | -2.83 | 0.73  | 1.67  | -0.06 | -0.33 | -3.83 | 525 | 2.18 | 1-Hexylquinolinium tetrafluoroborate                                                              |
| <b>363</b> | Quin8 BF4                         | -7.55 | -5.95 | 6.77  | -3.00 | 1.19  | 1.67  | -0.06 | -0.33 | -3.83 | 580 | 2.39 | 1-Octylquinolinium tetrafluoroborate                                                              |
| <b>364</b> | Quin8 Br                          | -7.55 | -5.95 | 6.77  | -3.00 | 1.19  | -0.52 | -5.52 | -2.16 | -1.13 | 463 | 2.36 | 1-Octylquinolinium bromide                                                                        |
| <b>365</b> | Quin106 Cl                        | -3.19 | -1.99 | 3.20  | -1.15 | 0.26  | -0.57 | -5.73 | -2.31 | -1.25 | 345 | 1.31 | 1-[(Hexyloxy)methyl]quinolinium chloride                                                          |
| <b>366</b> | Quin108 Cl                        | -5.27 | -1.84 | 2.22  | -0.10 | 0.66  | -0.57 | -5.73 | -2.31 | -1.25 | 421 | 1.32 | 1-[(Octyloxy)methyl]quinolinium chloride                                                          |
| <b>367</b> | Quin10-10 Cl                      | -7.56 | -0.68 | 2.47  | -0.62 | 1.53  | -0.57 | -5.73 | -2.31 | -1.25 | 489 | 1.70 | 1-[(Decyloxy)methyl]quinolinium chloride                                                          |
| <b>368</b> | Quin10-12 Cl                      | -9.13 | 0.23  | 2.06  | -0.80 | 1.46  | -0.57 | -5.73 | -2.31 | -1.25 | 520 | 1.91 | 1-[(Dodecyloxy)methyl]quinolinium chloride                                                        |
| <b>369</b> | IM55 (CF3SO2)2N                   | -4.42 | -4.59 | 1.39  | 1.41  | 0.75  | -1.19 | -2.15 | 2.86  | 2.10  | 713 | 0.36 | 1,3-Dipentylimidazolium 1,1,1-trifluoro-N-[(trifluoromethyl)sulfonyl]methanesulfonamide           |
| <b>370</b> | Py1(COO1)(Ph-3-OMe-4-OMe) Cl      | 2.48  | 4.98  | 2.05  | 1.69  | -4.39 | -0.57 | -5.73 | -2.31 | -1.25 | 89  | 3.36 | 1-[1-(3,4-Dimethoxyphenyl)-2-methoxy-2-oxoethyl]pyridinium chloride                               |
| <b>371</b> | Py1(COO1)(Ph-(3,4-OCH2O-)) Br     | 3.15  | 5.90  | 2.96  | 0.51  | -4.03 | -0.52 | -5.52 | -2.16 | -1.13 | 75  | 3.46 | 1-[1-(1,3-Benzodioxol-5-yl)-2-methoxy-2-oxoethyl]pyridinium bromide                               |
| <b>372</b> | Py1(COO4)(Ph-(3,4-OCH2O-)) Br     | -0.04 | 6.08  | 1.97  | 1.50  | -4.27 | -0.52 | -5.52 | -2.16 | -1.13 | 156 | 3.60 | 1-[1-(1,3-Benzodioxol-5-yl)-2-butoxy-2-oxoethyl]pyridinium bromide                                |
| <b>373</b> | Py2 Cl                            | 3.56  | -7.36 | 2.26  | 1.22  | -1.59 | -0.57 | -5.73 | -2.31 | -1.25 | 182 | 0.74 | 1-Ethylpyridinium chloride                                                                        |
| <b>374</b> | Py1CN (CF3SO2)2N                  | 5.10  | -3.86 | 6.39  | -5.86 | -2.84 | -1.19 | -2.15 | 2.86  | 2.10  | 278 | 2.71 | 1-(Cyanomethyl)pyridinium 1,1,1-trifluoro-N-[(trifluoromethyl)sulfonyl]methanesulfonamide         |
| <b>375</b> | Py1CN Cl                          | 5.10  | -3.86 | 6.39  | -5.86 | -2.84 | -0.57 | -5.73 | -2.31 | -1.25 | -1  | 2.34 | 1-(Cyanomethyl)pyridinium chloride                                                                |
| <b>376</b> | Py1COO1(COO1)(Ph-(3,4-OCH2O-)) Br | -0.87 | 11.80 | 5.15  | -1.25 | -8.30 | -0.52 | -5.52 | -2.16 | -1.13 | -8  | 6.12 | 1-[2-[1-(1,3-Benzodioxol-5-yl)-2-methoxy-2-oxoethyl]pyridinium bromide                            |
| <b>377</b> | Py1COO1(COO4)(Ph-(3,4-OCH2O-)) Br | -4.31 | 12.32 | 4.51  | -0.39 | -7.74 | -0.52 | -5.52 | -2.16 | -1.13 | 100 | 6.11 | 1-[2-[1-(1,3-Benzodioxol-5-yl)-2-butoxy-2-oxoethyl]pyridinium bromide                             |
| <b>378</b> | Py1COO2 (CF3SO2)2N                | 4.31  | 2.25  | -0.36 | 0.90  | -2.53 | -1.19 | -2.15 | 2.86  | 2.10  | 389 | 2.43 | 1-(2-Ethoxy-2-oxoethyl)pyridinium 1,1,1-trifluoro-N-[(trifluoromethyl)sulfonyl]methanesulfonamide |
| <b>379</b> | Py1COO2 8OSO3                     | 4.31  | 2.25  | -0.36 | 0.90  | -2.53 | -1.48 | -1.82 | 3.86  | 4.62  | 466 | 2.55 | 1-(2-Ethoxy-2-oxoethyl)pyridinium octyl sulfate                                                   |
| <b>380</b> | Py1COO2 Br                        | 4.31  | 2.25  | -0.36 | 0.90  | -2.53 | -0.52 | -5.52 | -2.16 | -1.13 | 120 | 2.23 | 1-(2-Ethoxy-2-oxoethyl)pyridinium bromide                                                         |
| <b>381</b> | Py1COO2 PF6                       | 4.31  | 2.25  | -0.36 | 0.90  | -2.53 | 1.13  | -1.14 | -0.21 | -3.53 | 226 | 2.54 | 1-(2-Ethoxy-2-oxoethyl)pyridinium hexafluorophosphate                                             |
| <b>382</b> | Py3 (CF3SO2)2N                    | 1.68  | -7.24 | 3.58  | 0.18  | -0.27 | -1.19 | -2.15 | 2.86  | 2.10  | 528 | 1.04 | 1-Propylpyridinium 1,1,1-trifluoro-N-[(trifluoromethyl)sulfonyl]methanesulfonamide                |
| <b>383</b> | Py3 Br                            | 1.68  | -7.24 | 3.58  | 0.18  | -0.27 | -0.52 | -5.52 | -2.16 | -1.13 | 259 | 0.93 | 1-Propylpyridinium bromide                                                                        |
| <b>384</b> | Py4 Cl                            | 0.96  | -6.71 | 2.76  | 0.70  | -0.52 | -0.57 | -5.73 | -2.31 | -1.25 | 265 | 0.76 | 1-Butylpyridinium chloride                                                                        |
| <b>385</b> | Py4 Al2Cl7                        | 0.96  | -6.71 | 2.76  | 0.70  | -0.52 | -5.66 | -3.72 | 1.43  | 2.02  | 439 | 1.31 | 1-Butylpyridinium $\mu$ -chlorohexachlorodialuminate                                              |

|            |                  |        |       |      |       |       |       |       |       |       |                        |     |      |                                                                                                   |
|------------|------------------|--------|-------|------|-------|-------|-------|-------|-------|-------|------------------------|-----|------|---------------------------------------------------------------------------------------------------|
| <b>386</b> | Py4 N(CN)2       | 0.96   | -6.71 | 2.76 | 0.70  | -0.52 | -2.48 | 0.49  | 0.00  | 0.73  |                        | 453 | 0.85 | 1-Butylpyridinium N-cyanocyanamide                                                                |
| <b>387</b> | Py4 Br           | 0.96   | -6.71 | 2.76 | 0.70  | -0.52 | -0.52 | -5.52 | -2.16 | -1.13 |                        | 275 | 0.73 | 1-Butylpyridinium bromide                                                                         |
| <b>388</b> | Py4 1OSO3        | 0.96   | -6.71 | 2.76 | 0.70  | -0.52 | 1.36  | -1.16 | -0.44 | -1.31 |                        | 409 | 0.45 | 1-Butylpyridinium methyl sulfate                                                                  |
| <b>389</b> | Py4 8OSO3        | 0.96   | -6.71 | 2.76 | 0.70  | -0.52 | -1.48 | -1.82 | 3.86  | 4.62  |                        | 621 | 1.11 | 1-Butylpyridinium octyl sulfate                                                                   |
| <b>390</b> | Py4 BF4          | 0.96   | -6.71 | 2.76 | 0.70  | -0.52 | 1.67  | -0.06 | -0.33 | -3.83 | <b>383<sup>a</sup></b> | 392 | 0.74 | 1-Butylpyridinium tetrafluoroborate                                                               |
| <b>391</b> | Py4 CF3SO3       | 0.96   | -6.71 | 2.76 | 0.70  | -0.52 | 1.41  | -0.86 | 0.07  | -2.60 |                        | 411 | 0.56 | 1-Butylpyridinium trifluoromethanesulfonate                                                       |
| <b>392</b> | Py4 PF6          | 0.96   | -6.71 | 2.76 | 0.70  | -0.52 | 1.13  | -1.14 | -0.21 | -3.53 |                        | 381 | 0.66 | 1-Butylpyridinium hexafluorophosphate                                                             |
| <b>393</b> | Py5 (CF3SO2)2N   | -0.24  | -6.22 | 2.71 | 0.59  | 0.14  | -1.19 | -2.15 | 2.86  | 2.10  |                        | 589 | 0.70 | 1-Pentylpyridinium 1,1,1-trifluoro-N-<br>[(trifluoromethyl)sulfonyl]methanesulfonamide            |
| <b>394</b> | Py5 Br           | -0.24  | -6.22 | 2.71 | 0.59  | 0.14  | -0.52 | -5.52 | -2.16 | -1.13 |                        | 320 | 0.81 | 1-Pentylpyridinium bromide                                                                        |
| <b>395</b> | Py6 (CF3SO2)2N   | -0.95  | -5.90 | 2.50 | 0.55  | 0.12  | -1.19 | -2.15 | 2.86  | 2.10  | <b>612<sup>a</sup></b> | 604 | 0.64 | 1-Hexylpyridinium 1,1,1-trifluoro-N-<br>[(trifluoromethyl)sulfonyl]methanesulfonamide             |
| <b>396</b> | Py6 CF3SO3       | -0.95  | -5.90 | 2.50 | 0.55  | 0.12  | 1.41  | -0.86 | 0.07  | -2.60 |                        | 471 | 0.74 | 1-Hexylpyridinium trifluoromethanesulfonate                                                       |
| <b>397</b> | Py6 Cl           | -0.95  | -5.90 | 2.50 | 0.55  | 0.12  | -0.57 | -5.73 | -2.31 | -1.25 |                        | 324 | 0.83 | 1-Hexylpyridinium chloride                                                                        |
| <b>398</b> | Py6 PF6          | -0.95  | -5.90 | 2.50 | 0.55  | 0.12  | 1.13  | -1.14 | -0.21 | -3.53 |                        | 440 | 0.84 | 1-Hexylpyridinium hexafluorophosphate                                                             |
| <b>399</b> | Py8 Cl           | -3.41  | -5.10 | 2.61 | 0.39  | 1.43  | -0.57 | -5.73 | -2.31 | -1.25 |                        | 416 | 1.19 | 1-Octylpyridinium chloride                                                                        |
| <b>400</b> | Py8 (CF3SO2)2N   | -3.41  | -5.10 | 2.61 | 0.39  | 1.43  | -1.19 | -2.15 | 2.86  | 2.10  | <b>629<sup>b</sup></b> | 695 | 0.77 | 1-Octylpyridinium 1,1,1-trifluoro-N-<br>[(trifluoromethyl)sulfonyl]methanesulfonamide             |
| <b>401</b> | Py-10 Br         | -5.41  | -4.43 | 2.31 | 0.46  | 1.66  | -0.52 | -5.52 | -2.16 | -1.13 |                        | 479 | 1.31 | 1-Decylpyridinium bromide                                                                         |
| <b>402</b> | Py-16 Br         | -11.79 | -2.66 | 2.50 | 0.08  | 3.09  | -0.52 | -5.52 | -2.16 | -1.13 |                        | 659 | 2.11 | 1-Hexadecylpyridinium bromide                                                                     |
| <b>403</b> | Py-16 Cl         | -11.79 | -2.66 | 2.50 | 0.08  | 3.09  | -0.57 | -5.73 | -2.31 | -1.25 |                        | 649 | 2.13 | 1-Hexadecylpyridinium chloride                                                                    |
| <b>404</b> | Py3OH (CF3SO2)2N | 9.31   | 2.44  | 2.69 | -3.75 | 1.97  | -1.19 | -2.15 | 2.86  | 2.10  |                        | 342 | 2.49 | 1-(3-Hydroxypropyl)pyridinium 1,1,1-trifluoro-N-<br>[(trifluoromethyl)sulfonyl]methanesulfonamide |
| <b>405</b> | Py3OH Cl         | 9.31   | 2.44  | 2.69 | -3.75 | 1.97  | -0.57 | -5.73 | -2.31 | -1.25 |                        | 62  | 2.21 | 1-(3-Hydroxypropyl)pyridinium chloride                                                            |
| <b>406</b> | Py3O1 (CF3SO2)2N | 4.39   | -2.54 | 2.94 | -0.77 | 0.87  | -1.19 | -2.15 | 2.86  | 2.10  |                        | 474 | 1.19 | 1-(3-Methoxypropyl)pyridinium 1,1,1-trifluoro-N-<br>[(trifluoromethyl)sulfonyl]methanesulfonamide |
| <b>407</b> | Py3O1 Cl         | 4.39   | -2.54 | 2.94 | -0.77 | 0.87  | -0.57 | -5.73 | -2.31 | -1.25 |                        | 195 | 0.96 | 1-(3-Methoxypropyl)pyridinium chloride                                                            |
| <b>408</b> | Py3SO3H CF3SO3   | 14.74  | 7.66  | 6.06 | -4.40 | 3.17  | 1.41  | -0.86 | 0.07  | -2.60 |                        | 83  | 4.28 | 1-(3-Sulfopropyl)pyridinium trifluoromethanesulfonate                                             |
| <b>409</b> | Py2OH (CF3SO2)2N | 10.28  | 2.57  | 3.54 | -4.42 | 2.59  | -1.19 | -2.15 | 2.86  | 2.10  |                        | 327 | 2.75 | 1-(2-Hydroxyethyl)pyridinium 1,1,1-trifluoro-N-<br>[(trifluoromethyl)sulfonyl]methanesulfonamide  |
| <b>410</b> | Py2OH I          | 10.28  | 2.57  | 3.54 | -4.42 | 2.59  | -0.65 | -5.31 | -1.63 | -1.12 |                        | 79  | 2.51 | 1-(2-Hydroxyethyl)pyridinium iodide                                                               |
| <b>411</b> | Py2O1 (CF3SO2)2N | 6.51   | -2.48 | 1.93 | -0.46 | -0.20 | -1.19 | -2.15 | 2.86  | 2.10  |                        | 400 | 1.27 | 1-(2-Methoxyethyl)pyridinium 1,1,1-trifluoro-N-<br>[(trifluoromethyl)sulfonyl]methanesulfonamide  |

|            |                            |        |       |       |       |       |       |       |       |       |     |      |                                                                                                     |
|------------|----------------------------|--------|-------|-------|-------|-------|-------|-------|-------|-------|-----|------|-----------------------------------------------------------------------------------------------------|
| <b>412</b> | Py2O1 Cl                   | 6.51   | -2.48 | 1.93  | -0.46 | -0.20 | -0.57 | -5.73 | -2.31 | -1.25 | 120 | 0.83 | 1-(2-Methoxyethyl)pyridinium chloride                                                               |
| <b>413</b> | Py2O2 (CF3SO2)2N           | 4.79   | -2.48 | 2.51  | -0.28 | 0.17  | -1.19 | -2.15 | 2.86  | 2.10  | 451 | 1.13 | 1-(2-Ethoxyethyl)pyridinium 1,1,1-trifluoro-N-<br>[(trifluoromethyl)sulfonyl]methanesulfonamide     |
| <b>414</b> | Py2O2 Br                   | 4.79   | -2.48 | 2.51  | -0.28 | 0.17  | -0.52 | -5.52 | -2.16 | -1.13 | 182 | 0.82 | 1-(2-Ethoxyethyl)pyridinium bromide                                                                 |
| <b>415</b> | Py1O2 (CF3SO2)2N           | 5.70   | -2.01 | -0.01 | 1.57  | 0.11  | -1.19 | -2.15 | 2.86  | 2.10  | 457 | 1.15 | 1-(Ethoxymethyl)pyridinium 1,1,1-trifluoro-N-<br>[(trifluoromethyl)sulfonyl]methanesulfonamide      |
| <b>416</b> | Py1O2 Cl                   | 5.70   | -2.01 | -0.01 | 1.57  | 0.11  | -0.57 | -5.73 | -2.31 | -1.25 | 178 | 0.90 | 1-(Ethoxymethyl)pyridinium chloride                                                                 |
| <b>417</b> | Pyr66 BF4                  | -5.18  | -2.55 | -3.71 | 5.26  | 0.71  | 1.67  | -0.06 | -0.33 | -3.83 | 633 | 2.11 | 1,1-Dihexylpyrrolidinium tetrafluoroborate                                                          |
| <b>418</b> | IM66 (CF3SO2)2N            | -6.81  | -4.32 | 1.77  | 1.22  | 1.01  | -1.19 | -2.15 | 2.86  | 2.10  | 771 | 0.65 | 1,3-Dihexylimidazolium 1,1,1-trifluoro-N-<br>[(trifluoromethyl)sulfonyl]methanesulfonamide          |
| <b>419</b> | IM-10-10-2Me<br>(CF3SO2)2N | -13.99 | -1.46 | 0.53  | 1.86  | 2.47  | -1.19 | -2.15 | 2.86  | 2.10  | 984 | 1.45 | 1,3-Didecyl-2-methylimidazolium 1,1,1-trifluoro-N-<br>[(trifluoromethyl)sulfonyl]methanesulfonamide |
| <b>420</b> | Pyr-12-2OH Cl              | -2.02  | 6.35  | -2.97 | 0.68  | 3.83  | -0.57 | -5.73 | -2.31 | -1.25 | 440 | 2.61 | 1-Dodecyl-1-(2-hydroxyethyl)pyrrolidinium chloride                                                  |
| <b>421</b> | IM-14-2OH-2Me Cl           | -5.40  | 4.92  | -0.25 | -1.53 | 4.03  | -0.57 | -5.73 | -2.31 | -1.25 | 493 | 2.45 | 1-(2-Hydroxyethyl)-2-methyl-3-tetradecylimidazolium chloride                                        |
| <b>422</b> | IM-16-2OH-2Me Cl           | -7.84  | 5.39  | 0.95  | -2.31 | 4.75  | -0.57 | -5.73 | -2.31 | -1.25 | 557 | 2.78 | 1-Hexadecyl-3-(2-hydroxyethyl)-2-methylimidazolium chloride                                         |
| <b>423</b> | IM2OH-(2Ph) Cl             | 2.41   | 2.66  | 3.93  | -4.66 | 3.40  | -0.57 | -5.73 | -2.31 | -1.25 | 249 | 2.49 | 1-(2-hydroxyethyl)-3-(2-phenylethyl)imidazolium chloride                                            |
| <b>424</b> | IM2OH-(2OH) Cl             | 11.50  | 9.67  | 5.76  | -7.07 | 5.63  | -0.57 | -5.73 | -2.31 | -1.25 | 48  | 4.36 | 1,3-di-(2-hydroxyethyl)imidazolium chloride                                                         |
| <b>425</b> | IM1O3-1O3 Cl               | 1.60   | 2.22  | -0.33 | 2.43  | 0.25  | -0.57 | -5.73 | -2.31 | -1.25 | 274 | 1.76 | 1,3-Bis(propoxymethyl)imidazolium chloride                                                          |
| <b>426</b> | IM1O4-1O4 Cl               | -0.46  | 2.39  | -1.08 | 3.65  | -0.28 | -0.57 | -5.73 | -2.31 | -1.25 | 323 | 2.03 | 1,3-Bis(butoxymethyl)imidazolium chloride                                                           |
| <b>427</b> | IM1O5-1O5 Cl               | -2.37  | 3.08  | -1.21 | 3.28  | 0.15  | -0.57 | -5.73 | -2.31 | -1.25 | 374 | 2.12 | 1,3-Bis[(pentyloxy)methyl]imidazolium chloride                                                      |
| <b>428</b> | IM1O6-1O6 Cl               | -4.54  | 3.90  | -1.41 | 3.31  | -0.06 | -0.57 | -5.73 | -2.31 | -1.25 | 416 | 2.40 | 1,3-Bis[(hexyloxy)methyl]imidazolium chloride                                                       |
| <b>429</b> | IM1O7-1O7 Cl               | -6.51  | 3.95  | -2.25 | 3.80  | 0.56  | -0.57 | -5.73 | -2.31 | -1.25 | 489 | 2.49 | 1,3-Bis[(heptyloxy)methyl]imidazolium chloride                                                      |
| <b>430</b> | IM1O8-1O8 Cl               | -8.29  | 4.70  | -2.62 | 3.95  | 0.51  | -0.57 | -5.73 | -2.31 | -1.25 | 529 | 2.75 | 1,3-Bis[(octyloxy)methyl]imidazolium chloride                                                       |
| <b>431</b> | IM1O9-1O9 Cl               | -10.86 | 5.16  | -1.92 | 3.61  | 0.67  | -0.57 | -5.73 | -2.31 | -1.25 | 586 | 2.90 | 1,3-Bis[(nonyloxy)methyl]imidazolium chloride                                                       |
| <b>432</b> | IM1O-10-10-10 Cl           | -12.39 | 4.91  | -2.50 | 3.87  | 0.83  | -0.57 | -5.73 | -2.31 | -1.25 | 632 | 2.97 | 1,3-Bis[(decyloxy)methyl]imidazolium chloride                                                       |
| <b>433</b> | IM1O-11-10-11 Cl           | -14.03 | 6.14  | -3.22 | 4.48  | 0.64  | -0.57 | -5.73 | -2.31 | -1.25 | 670 | 3.38 | 1,3-Bis[(undecyloxy)methyl]imidazolium chloride                                                     |
| <b>434</b> | IM1O-12-10-12 Cl           | -16.24 | 6.96  | -2.08 | 3.57  | 0.63  | -0.57 | -5.73 | -2.31 | -1.25 | 704 | 3.57 | 1,3-Bis[(dodecyloxy)methyl]imidazolium chloride                                                     |
| <b>435</b> | IM1O-14-10-14 Cl           | -19.66 | 8.67  | -3.30 | 4.57  | 1.51  | -0.57 | -5.73 | -2.31 | -1.25 | 820 | 4.09 | 1,3-Bis[(tetradecyloxy)methyl]imidazolium chloride                                                  |
| <b>436</b> | IM1O-16-10-16 Cl           | -21.63 | 9.04  | -1.98 | 3.39  | 2.77  | -0.57 | -5.73 | -2.31 | -1.25 | 884 | 4.09 | 1,3-Bis[(hexadecyloxy)methyl]imidazolium chloride                                                   |
| <b>437</b> | IM01 BF4                   | 5.03   | -5.69 | -6.83 | -6.30 | -3.04 | 1.67  | -0.06 | -0.33 | -3.83 | 165 | 3.09 | 1-Methylimidazolium hydrogen tetrafluoroborate                                                      |

|            |                    |       |       |       |       |       |      |       |       |       |     |      |                                                     |
|------------|--------------------|-------|-------|-------|-------|-------|------|-------|-------|-------|-----|------|-----------------------------------------------------|
| <b>438</b> | IM01 HO1(1)COO     | 5.03  | -5.69 | -6.83 | -6.30 | -3.04 | 4.48 | 3.75  | -4.18 | 2.80  | 211 | 3.40 | 1-Methylimidazolium 2-hydroxypropanoate             |
| <b>439</b> | IM01 HO1(1)COO-S   | 5.03  | -5.69 | -6.83 | -6.30 | -3.04 | 4.81 | 4.31  | -4.51 | 3.25  | 216 | 3.47 | 1-Methylimidazolium (2S)-2-hydroxypropanoate        |
| <b>440</b> | IM01 1COO          | 5.03  | -5.69 | -6.83 | -6.30 | -3.04 | 4.20 | 2.41  | -5.87 | 3.73  | 145 | 3.41 | 1-methylimidazolium acetate                         |
| <b>441</b> | IM01 CF3COO        | 5.03  | -5.69 | -6.83 | -6.30 | -3.04 | 3.18 | 2.08  | -2.30 | -0.22 | 195 | 3.16 | 1-methylimidazolium trifluoroacetate                |
| <b>442</b> | IM01 CF3SO3        | 5.03  | -5.69 | -6.83 | -6.30 | -3.04 | 1.41 | -0.86 | 0.07  | -2.60 | 184 | 3.06 | 1-methylimidazolium 1,1,1-trifluoromethanesulfonate |
| <b>443</b> | IM02 HO1(1)COO     | 3.99  | -5.53 | -6.71 | -5.77 | -2.93 | 4.48 | 3.75  | -4.18 | 2.80  | 243 | 3.28 | 1-Ethylimidazolium 2-hydroxypropanoate              |
| <b>444</b> | IM02 HO1(1)COO-S   | 3.99  | -5.53 | -6.71 | -5.77 | -2.93 | 4.81 | 4.31  | -4.51 | 3.25  | 249 | 3.36 | 1-Ethylimidazolium (2S)-2-hydroxypropanoate         |
| <b>445</b> | IM03 HO1(1)COO     | 2.28  | -5.50 | -5.68 | -6.45 | -2.21 | 4.48 | 3.75  | -4.18 | 2.80  | 293 | 3.18 | 1-Propylimidazolium 2-hydroxypropanoate             |
| <b>446</b> | IM03 HO1(1)COO-S   | 2.28  | -5.50 | -5.68 | -6.45 | -2.21 | 4.81 | 4.31  | -4.51 | 3.25  | 299 | 3.26 | 1-Propylimidazolium (2S)-2-hydroxypropanoate        |
| <b>447</b> | IM04 HO1(1)COO     | 1.00  | -4.97 | -6.24 | -6.11 | -1.76 | 4.48 | 3.75  | -4.18 | 2.80  | 340 | 3.21 | 1-Butylimidazolium 2-hydroxypropanoate              |
| <b>448</b> | IM04 HO1(1)COO-S   | 1.00  | -4.97 | -6.24 | -6.11 | -1.76 | 4.81 | 4.31  | -4.51 | 3.25  | 346 | 3.28 | 1-Butylimidazolium (2S)-2-hydroxypropanoate         |
| <b>449</b> | IM04 1COO          | 1.00  | -4.97 | -6.24 | -6.11 | -1.76 | 4.20 | 2.41  | -5.87 | 3.73  | 274 | 3.23 | 1-butylimidazolium acetate                          |
| <b>450</b> | IM04 CF3COO        | 1.00  | -4.97 | -6.24 | -6.11 | -1.76 | 3.18 | 2.08  | -2.30 | -0.22 | 325 | 2.95 | 1-butylimidazolium trifluoroacetate                 |
| <b>451</b> | IM04 CF3SO3        | 1.00  | -4.97 | -6.24 | -6.11 | -1.76 | 1.41 | -0.86 | 0.07  | -2.60 | 314 | 2.82 | 1-butylimidazolium 1,1,1-trifluoromethanesulfonate  |
| <b>452</b> | IM05 HO1(1)COO     | -0.48 | -4.65 | -6.13 | -6.17 | -1.31 | 4.48 | 3.75  | -4.18 | 2.80  | 386 | 3.21 | 1-Pentylimidazolium 2-hydroxypropanoate             |
| <b>453</b> | IM05 HO1(1)COO-S   | -0.48 | -4.65 | -6.13 | -6.17 | -1.31 | 4.81 | 4.31  | -4.51 | 3.25  | 392 | 3.28 | 1-Pentylimidazolium (2S)-2-hydroxypropanoate        |
| <b>454</b> | IM06 HO1(1)COO     | -1.08 | -4.19 | -6.92 | -5.73 | -1.42 | 4.48 | 3.75  | -4.18 | 2.80  | 403 | 3.29 | 1-Hexylimidazolium 2-hydroxypropanoate              |
| <b>455</b> | IM06 HO1(1)COO-S   | -1.08 | -4.19 | -6.92 | -5.73 | -1.42 | 4.81 | 4.31  | -4.51 | 3.25  | 409 | 3.36 | 1-Hexylimidazolium (2S)-2-hydroxypropanoate         |
| <b>456</b> | IM07 HO1(1)COO     | -2.69 | -4.01 | -6.24 | -6.38 | -0.74 | 4.48 | 3.75  | -4.18 | 2.80  | 450 | 3.30 | 1-Heptylimidazolium 2-hydroxypropanoate             |
| <b>457</b> | IM07 HO1(1)COO-S   | -2.69 | -4.01 | -6.24 | -6.38 | -0.74 | 4.81 | 4.31  | -4.51 | 3.25  | 456 | 3.38 | 1-Heptylimidazolium (2S)-2-hydroxypropanoate        |
| <b>458</b> | IM08 HO1(1)COO     | -3.55 | -3.47 | -6.97 | -6.04 | -0.63 | 4.48 | 3.75  | -4.18 | 2.80  | 478 | 3.39 | 1-Octylimidazolium 2-hydroxypropanoate              |
| <b>459</b> | IM08 HO1(1)COO-S   | -3.55 | -3.47 | -6.97 | -6.04 | -0.63 | 4.81 | 4.31  | -4.51 | 3.25  | 484 | 3.47 | 1-Octylimidazolium (2S)-2-hydroxypropanoate         |
| <b>460</b> | IM09 HO1(1)COO     | -4.64 | -3.28 | -6.83 | -6.04 | -0.24 | 4.48 | 3.75  | -4.18 | 2.80  | 514 | 3.40 | 1-Nonylimidazolium 2-hydroxypropanoate              |
| <b>461</b> | IM09 HO1(1)COO-S   | -4.64 | -3.28 | -6.83 | -6.04 | -0.24 | 4.81 | 4.31  | -4.51 | 3.25  | 520 | 3.47 | 1-Nonylimidazolium (2S)-2-hydroxypropanoate         |
| <b>462</b> | IM0-10 HO1(1)COO   | -5.78 | -2.89 | -7.12 | -5.67 | 0.06  | 4.48 | 3.75  | -4.18 | 2.80  | 554 | 3.43 | 1-Decylimidazolium 2-hydroxypropanoate              |
| <b>463</b> | IM0-10 HO1(1)COO-S | -5.78 | -2.89 | -7.12 | -5.67 | 0.06  | 4.81 | 4.31  | -4.51 | 3.25  | 560 | 3.50 | 1-Decylimidazolium (2S)-2-hydroxypropanoate         |

|            |                      |       |       |       |       |       |       |       |       |       |     |      |                                                                           |
|------------|----------------------|-------|-------|-------|-------|-------|-------|-------|-------|-------|-----|------|---------------------------------------------------------------------------|
| <b>464</b> | IM0-11 HO1(1)COO     | -6.55 | -2.51 | -7.31 | -5.72 | -0.03 | 4.48  | 3.75  | -4.18 | 2.80  | 567 | 3.50 | 1-Undecylimidazolium 2-hydroxypropanoate                                  |
| <b>465</b> | IM0-11 HO1(1)COO-S   | -6.55 | -2.51 | -7.31 | -5.72 | -0.03 | 4.81  | 4.31  | -4.51 | 3.25  | 573 | 3.58 | 1-Undecylimidazolium (2S)-2-hydroxypropanoate                             |
| <b>466</b> | IM0-12 HO1(1)COO     | -7.34 | -2.19 | -7.84 | -5.07 | -0.29 | 4.48  | 3.75  | -4.18 | 2.80  | 586 | 3.54 | 1-Dodecylimidazolium 2-hydroxypropanoate                                  |
| <b>467</b> | IM0-12 HO1(1)COO-S   | -7.34 | -2.19 | -7.84 | -5.07 | -0.29 | 4.81  | 4.31  | -4.51 | 3.25  | 592 | 3.61 | 1-Dodecylimidazolium (2S)-2-hydroxypropanoate                             |
| <b>468</b> | IM0104 HO1(1)COO     | 1.36  | -0.40 | -9.16 | -3.36 | -1.19 | 4.48  | 3.75  | -4.18 | 2.80  | 377 | 3.66 | 1-(Butoxymethyl)imidazolium 2-hydroxypropanoate                           |
| <b>469</b> | IM0104 HO1(1)COO-S   | 1.36  | -0.40 | -9.16 | -3.36 | -1.19 | 4.81  | 4.31  | -4.51 | 3.25  | 383 | 3.74 | 1-(Butoxymethyl)imidazolium (2S)-2-hydroxypropanoate                      |
| <b>470</b> | IM0105 HO1(1)COO     | 0.12  | -0.39 | -8.73 | -4.18 | -1.24 | 4.48  | 3.75  | -4.18 | 2.80  | 393 | 3.67 | 1-[(Pentyloxy)methyl]imidazolium 2-hydroxypropanoate                      |
| <b>471</b> | IM0105 HO1(1)COO-S   | 0.12  | -0.39 | -8.73 | -4.18 | -1.24 | 4.81  | 4.31  | -4.51 | 3.25  | 399 | 3.75 | 1-[(Pentyloxy)methyl]imidazolium (2S)-2-hydroxypropanoate                 |
| <b>472</b> | IM0106 HO1(1)COO     | -0.43 | 0.45  | -9.42 | -3.76 | -1.21 | 4.48  | 3.75  | -4.18 | 2.80  | 411 | 3.83 | 1-[(Hexyloxy)methyl]imidazolium 2-hydroxypropanoate                       |
| <b>473</b> | IM0106 HO1(1)COO-S   | -0.43 | 0.45  | -9.42 | -3.76 | -1.21 | 4.81  | 4.31  | -4.51 | 3.25  | 417 | 3.91 | 1-[(Hexyloxy)methyl]imidazolium (2S)-2-hydroxypropanoate                  |
| <b>474</b> | IM0107 HO1(1)COO     | -1.75 | 0.26  | -9.61 | -3.55 | -0.93 | 4.48  | 3.75  | -4.18 | 2.80  | 453 | 3.80 | 1-[(Heptyloxy)methyl]imidazolium 2-hydroxypropanoate                      |
| <b>475</b> | IM0107 HO1(1)COO-S   | -1.75 | 0.26  | -9.61 | -3.55 | -0.93 | 4.81  | 4.31  | -4.51 | 3.25  | 459 | 3.88 | 1-[(Heptyloxy)methyl]imidazolium (2S)-2-hydroxypropanoate                 |
| <b>476</b> | IM0108 HO1(1)COO     | -2.94 | 0.97  | -9.30 | -3.78 | -0.63 | 4.48  | 3.75  | -4.18 | 2.80  | 484 | 3.84 | 1-[(Octyloxy)methyl]imidazolium 2-hydroxypropanoate                       |
| <b>477</b> | IM0108 HO1(1)COO-S   | -2.94 | 0.97  | -9.30 | -3.78 | -0.63 | 4.81  | 4.31  | -4.51 | 3.25  | 490 | 3.92 | 1-[(Octyloxy)methyl]imidazolium (2S)-2-hydroxypropanoate                  |
| <b>478</b> | IM0109 HO1(1)COO     | -4.56 | 0.87  | -8.72 | -4.46 | -0.49 | 4.48  | 3.75  | -4.18 | 2.80  | 516 | 3.82 | 1-[(Nonyloxy)methyl]imidazolium 2-hydroxypropanoate                       |
| <b>479</b> | IM0109 HO1(1)COO-S   | -4.56 | 0.87  | -8.72 | -4.46 | -0.49 | 4.81  | 4.31  | -4.51 | 3.25  | 522 | 3.90 | 1-[(Nonyloxy)methyl]imidazolium (2S)-2-hydroxypropanoate                  |
| <b>480</b> | IM010-10 HO1(1)COO   | -5.09 | 0.97  | -9.44 | -3.89 | -0.65 | 4.48  | 3.75  | -4.18 | 2.80  | 533 | 3.90 | 1-[(Decyloxy)methyl]imidazolium 2-hydroxypropanoate                       |
| <b>481</b> | IM010-10 HO1(1)COO-S | -5.09 | 0.97  | -9.44 | -3.89 | -0.65 | 4.81  | 4.31  | -4.51 | 3.25  | 539 | 3.98 | 1-[(Decyloxy)methyl]imidazolium (2S)-2-hydroxypropanoate                  |
| <b>482</b> | IM010-11 HO1(1)COO   | -6.60 | 1.67  | -9.05 | -4.06 | -0.50 | 4.48  | 3.75  | -4.18 | 2.80  | 567 | 3.96 | 1-[(Undecyloxy)methyl]imidazolium 2-hydroxypropanoate                     |
| <b>483</b> | IM010-11 HO1(1)COO-S | -6.60 | 1.67  | -9.05 | -4.06 | -0.50 | 4.81  | 4.31  | -4.51 | 3.25  | 573 | 4.04 | 1-[(Undecyloxy)methyl]imidazolium (2S)-2-hydroxypropanoate                |
| <b>484</b> | IM010-12 HO1(1)COO   | -7.33 | 2.17  | -9.65 | -4.12 | 0.13  | 4.48  | 3.75  | -4.18 | 2.80  | 602 | 4.09 | 1-[(Dodecyloxy)methyl]imidazolium 2-hydroxypropanoate                     |
| <b>485</b> | IM010-12 HO1(1)COO-S | -7.33 | 2.17  | -9.65 | -4.12 | 0.13  | 4.81  | 4.31  | -4.51 | 3.25  | 608 | 4.17 | 1-[(Dodecyloxy)methyl]imidazolium (2S)-2-hydroxypropanoate                |
| <b>486</b> | Py0 Cl               | 3.78  | -5.25 | -7.66 | -7.06 | -2.26 | -0.57 | -5.73 | -2.31 | -1.25 | 82  | 3.14 | pyridinium hydrochloride                                                  |
| <b>487</b> | 0600NN (CF3SO2)2N    | 3.71  | 0.96  | -4.42 | 2.25  | -1.41 | -1.19 | -2.15 | 2.86  | 2.10  | 470 | 2.23 | 1-hexyl-1,4-diaza[2.2.2]bicyclooctanium bis(trifluoromethylsulfonyl)imide |
| <b>488</b> | IM00 1COO            | 7.34  | -3.31 | -7.65 | -5.38 | -2.63 | 4.20  | 2.41  | -5.87 | 3.73  | 109 | 3.53 | 1H-Imidazol-1-ium acetate                                                 |
| <b>489</b> | IM00 CF3COO          | 7.34  | -3.31 | -7.65 | -5.38 | -2.63 | 3.18  | 2.08  | -2.30 | -0.22 | 160 | 3.30 | 1H-Imidazol-1-ium trifluoroacetate                                        |

|            |                     |       |       |       |       |       |       |       |       |       |                    |     |      |                                                                                                  |
|------------|---------------------|-------|-------|-------|-------|-------|-------|-------|-------|-------|--------------------|-----|------|--------------------------------------------------------------------------------------------------|
| <b>490</b> | IM00 CFSO3          | 7.34  | -3.31 | -7.65 | -5.38 | -2.63 | 1.41  | -0.86 | 0.07  | -2.60 |                    | 149 | 3.15 | 1H-Imidazol-1-ium 1,1,1-trifluoromethanesulfonate                                                |
| <b>491</b> | IM01-2Me (CF3SO2)2N | 4.73  | -5.69 | -5.54 | -6.03 | -3.20 | -1.19 | -2.15 | 2.86  | 2.10  |                    | 319 | 2.99 | 1,2-dimethylimidazolium 1,1,1-trifluoro-N-[(trifluoromethyl)sulfonyl]methanesulfonamide          |
| <b>492</b> | IM16-2Me Cl         | -2.23 | -6.01 | 3.61  | -0.45 | 0.11  | -0.57 | -5.73 | -2.31 | -1.25 |                    | 338 | 1.13 | 1-hexyl-2,3-dimethyl imidazolium chloride<br>imidazolium chloride                                |
| <b>493</b> | IM13-2Me (CF3SO2)2N | 1.81  | -6.77 | 2.84  | 0.66  | -0.92 | -1.19 | -2.15 | 2.86  | 2.10  | 555 <sup>a</sup>   | 512 | 0.91 | 1,2-dimethyl-3-propylimidazolium 1,1,1-trifluoro-N-[(trifluoromethyl)sulfonyl]methanesulfonamide |
| <b>494</b> | IM18 N(CN)2         | -3.07 | -4.67 | 0.46  | 1.44  | 0.28  | -2.48 | 0.49  | 0.00  | 0.73  |                    | 581 | 0.68 | 1-Methyl-3-octylimidazolium dicyanamide                                                          |
| <b>495</b> | Py4-3Me (CF3SO2)2N  | -1.02 | -6.72 | 3.14  | 0.02  | -0.45 | -1.19 | -2.15 | 2.86  | 2.10  | 548 <sup>b</sup>   | 582 | 0.91 | 1-butyl-3-methylpyridinium 1,1,1-trifluoro-N-[(trifluoromethyl)sulfonyl]methanesulfonamide       |
| <b>496</b> | IM18 SbF6           | -3.07 | -4.67 | 0.46  | 1.44  | 0.28  | 1.35  | -0.70 | -0.12 | -3.68 |                    | 517 | 1.00 | 1-methyl-3-octylimidazolium hexafluoroantimonate                                                 |
| <b>497</b> | IM11 (10)2PO2       | 4.18  | -6.87 | 0.65  | 1.98  | -1.80 | 1.30  | -1.22 | 0.20  | -0.78 |                    | 348 | 0.57 | 1,3-dimethyl imidazolium dimethyl phosphite                                                      |
| <b>498</b> | IM18 CF3COO         | -3.07 | -4.67 | 0.46  | 1.44  | 0.28  | 3.18  | 2.08  | -2.30 | -0.22 | 544 <sup>b</sup>   | 549 | 1.21 | 1-methyl-3-octylimidazolium trifluoroacetate                                                     |
| <b>499</b> | IM12OH 1COO         | 9.73  | 2.71  | 2.15  | -3.96 | 2.49  | 4.20  | 2.41  | -5.87 | 3.73  |                    | 173 | 3.47 | 1-(2-hydroxyethyl)-3-methylimidazolium acetate                                                   |
| <b>500</b> | IM12OH N(CN)2       | 9.73  | 2.71  | 2.15  | -3.96 | 2.49  | -2.48 | 0.49  | 0.00  | 0.73  | 231.8 <sup>b</sup> | 256 | 2.69 | 1-(2-hydroxyethyl)-3-methylimidazolium dicyanamide                                               |
| <b>501</b> | IM12OH NO3          | 9.73  | 2.71  | 2.15  | -3.96 | 2.49  | -6.94 | -0.46 | -2.37 | -1.73 |                    | 90  | 2.41 | 1-(2-hydroxyethyl)-3-methylimidazolium nitrate                                                   |
| <b>502</b> | Py6-4NMe2 Br        | -3.42 | -6.49 | 5.27  | -1.90 | -0.04 | -0.52 | -5.52 | -2.16 | -1.13 |                    | 350 | 1.62 | 4-(Dimethylamino)-1-hexylpyridinium bromide                                                      |
| <b>503</b> | Py8-4Me (CF3SO2)2N  | -4.69 | -5.10 | 3.21  | 0.18  | 1.30  | -1.19 | -2.15 | 2.86  | 2.10  |                    | 717 | 0.91 | 1-octyl-4-methylpyridinium 1,1,1-trifluoro-N-[(trifluoromethyl)sulfonyl]methanesulfonamide       |
| <b>504</b> | Py4 (CF3SO2)2N      | 0.96  | -6.71 | 2.76  | 0.70  | -0.52 | -1.19 | -2.15 | 2.86  | 2.10  |                    | 544 | 0.80 | 1-butylpyridinium 1,1,1-trifluoro-N-[(trifluoromethyl)sulfonyl]methanesulfonamide                |
| <b>505</b> | Pip12OH N(CN)2      | 10.68 | 4.70  | -2.87 | 1.16  | 3.53  | -2.48 | 0.49  | 0.00  | 0.73  |                    | 336 | 2.85 | 1-(2-hydroxyethyl)-1-methylpiperidinium N-cyanocyanamide                                         |
| <b>506</b> | Pyr18 (CF3SO2)2N    | -2.33 | -3.03 | -3.71 | 5.36  | 0.63  | -1.19 | -2.15 | 2.86  | 2.10  | 642 <sup>b</sup>   | 720 | 1.53 | 1-methyl-1-octylpyrrolidinium 1,1,1-trifluoro-N-[(trifluoromethyl)sulfonyl]methanesulfonamide    |
| <b>507</b> | Mor14 N(CN)2        | 6.23  | 0.06  | -3.73 | 3.90  | 0.91  | -2.48 | 0.49  | 0.00  | 0.73  |                    | 412 | 2.05 | 4-butyl-4-methylmorpholinium dicyanamide                                                         |
| <b>508</b> | Mor12OH N(CN)2      | 13.05 | 7.64  | -1.48 | 2.13  | 2.17  | -2.48 | 0.49  | 0.00  | 0.73  |                    | 238 | 3.45 | 4-(2-hydroxyethyl)-4-methylmorpholinium dicyanamide                                              |
| <b>509</b> | Mor12 N(CN)2        | 8.90  | -0.32 | -3.78 | 4.51  | 0.50  | -2.48 | 0.49  | 0.00  | 0.73  |                    | 346 | 2.27 | 1-ethyl-1-methylmorpholinium dicyanamide                                                         |
| <b>510</b> | Mor12 (CF3SO2)2N    | 8.90  | -0.32 | -3.78 | 4.51  | 0.50  | -1.19 | -2.15 | 2.86  | 2.10  |                    | 437 | 2.20 | 1-ethyl-1-methylmorpholinium 1,1,1-trifluoro-N-[(trifluoromethyl)sulfonyl]methanesulfonamide     |
| <b>511</b> | IM14 1COO           | 0.58  | -5.91 | 1.21  | 1.20  | -0.39 | 4.20  | 2.41  | -5.87 | 3.73  | 383.2 <sup>a</sup> | 392 | 1.64 | 1-butyl-3-methylimidazolium acetate                                                              |
| <b>512</b> | IM16 1COO           | -1.54 | -5.78 | 1.66  | 0.51  | -0.75 | 4.20  | 2.41  | -5.87 | 3.73  |                    | 420 | 1.62 | 1-hexyl-3-methylimidazolium acetate                                                              |
| <b>513</b> | IM16 CF3COO         | -1.54 | -5.78 | 1.66  | 0.51  | -0.75 | 3.18  | 2.08  | -2.30 | -0.22 |                    | 471 | 0.90 | 1-hexyl-3-methylimidazolium trifluoroacetate                                                     |
| <b>514</b> | Pyr14 1COO          | 1.96  | -4.12 | -3.78 | 5.67  | -0.03 | 4.20  | 2.41  | -5.87 | 3.73  |                    | 436 | 2.50 | 1-butyl-1-methylpyrrolidinium acetate                                                            |
| <b>515</b> | IM18 NO3            | -3.07 | -4.67 | 0.46  | 1.44  | 0.28  | -6.94 | -0.46 | -2.37 | -1.73 |                    | 415 | 1.43 | 1-methyl-3-octylimidazolium nitrate                                                              |



|            |                                                           |        |       |       |      |       |       |       |      |      |                         |     |      |                                                                                                 |
|------------|-----------------------------------------------------------|--------|-------|-------|------|-------|-------|-------|------|------|-------------------------|-----|------|-------------------------------------------------------------------------------------------------|
| <b>516</b> | IM14 (CF <sub>3</sub> SO <sub>2</sub> ) <sub>3</sub> C    | 0.58   | -5.91 | 1.21  | 1.20 | -0.39 | -0.58 | -1.39 | 3.93 | 0.50 | <b>783<sup>a</sup></b>  | 593 | 0.50 | 1-butyl-3-methylimidazolium tris[(trifluoromethyl)sulfonyl]methide                              |
| <b>517</b> | IM1-18 (CF <sub>3</sub> SO <sub>2</sub> ) <sub>2</sub> N  | -13.76 | -1.31 | -0.02 | 1.21 | 2.84  | -1.19 | -2.15 | 2.86 | 2.10 | <b>1052<sup>a</sup></b> | 984 | 1.49 | 1-methyl-3-octadecylimidazolium 1,1,1-trifluoro-N-[(trifluoromethyl)sulfonyl]methanesulfonamide |
| <b>518</b> | Py4-3Me (CF <sub>3</sub> SO <sub>2</sub> ) <sub>2</sub> N | -1.02  | -6.72 | 3.14  | 0.02 | -0.45 | -1.19 | -2.15 | 2.86 | 2.10 | <b>622<sup>a</sup></b>  | 582 | 0.91 | 1-butyl-3-methylpyridinium 1,1,1-trifluoro-N-[(trifluoromethyl)sulfonyl]methanesulfonamide      |
| <b>519</b> | Py6-3Me (CF <sub>3</sub> SO <sub>2</sub> ) <sub>2</sub> N | -3.03  | -5.66 | 2.50  | 0.25 | 0.50  | -1.19 | -2.15 | 2.86 | 2.10 | <b>624<sup>a</sup></b>  | 659 | 0.69 | 1-hexyl-3-methylpyridinium 1,1,1-trifluoro-N-[(trifluoromethyl)sulfonyl]methanesulfonamide      |
| <b>520</b> | Pyr13 (CF <sub>3</sub> SO <sub>2</sub> ) <sub>2</sub> N   | 3.13   | -4.34 | -3.85 | 5.63 | -0.10 | -1.19 | -2.15 | 2.86 | 2.10 | <b>554<sup>a</sup></b>  | 580 | 1.81 | 1-methyl-1-propylpyrrolidinium 1,1,1-trifluoro-N-[(trifluoromethyl)sulfonyl]methanesulfonamide  |

<sup>a</sup> Ref. [13]; <sup>b</sup> Ref. [12]

**Table S2.** Statistical parameters of the PLS model

| Component | R <sup>2</sup> X | R <sup>2</sup> X(cum) | Eigenvalue | R <sup>2</sup> Y | R <sup>2</sup> Y(cum) | Q <sup>2</sup> | Q <sup>2</sup> (cum) |
|-----------|------------------|-----------------------|------------|------------------|-----------------------|----------------|----------------------|
| <b>1</b>  | 0.27             | 0.27                  | 2.43       | 0.779            | 0.779                 | 0.709          | 0.709                |
| <b>2</b>  | 0.135            | 0.405                 | 1.22       | 0.141            | 0.919                 | 0.338          | 0.807                |

## References

- 34 K. L. dos Santos Castro, P. G. de Lima, L. S. M. e Miranda, R. O. M. A. de Souza, *Tetrahedron Lett.*, 2011, **52**, 4168-4171.
- 35 J. D. Holbrey, K. R. Seddon, *J. Chem. Soc, Dalton Trans.*, 1999, 2133-2140.
- 36 W. Guan, X.-X. Ma, L. Li, J. Tong, D.-W. Fang, J.-Z. Yang, *J. Phys. Chem. B*, 2011, **115**, 12915-12920.
- 37 L. P. Jameson S. V. Dzyuba, *RSC Adv.*, 2013, **3**, 4582-4587.
- 38 B. Lu, A. Xu, J. Wang, *Green Chem.*, 2014, **16**, 1326-1335.
